# **Analysis of Genetically Determined Gene Expression Suggests Role of Inflammatory Processes in Exfoliation Syndrome**

Jibril B. Hirbo,<sup>1,4\*</sup> Francesca Pasutto,<sup>2</sup> Eric R. Gamazon,<sup>1,4,5</sup> Patrick Evans,<sup>1</sup> Priyanka Pawar,<sup>3</sup> Daniel Berner,<sup>7</sup> Julia Sealock,<sup>1</sup> Ran Tao,<sup>6</sup> Peter S. Straub,<sup>1</sup> Anuar I. Konkashbaev,<sup>1</sup> Max Breyer,<sup>1</sup> Ursula Schlötzer-Schrehardt,<sup>7</sup> André Reis,<sup>2</sup> Milam A. Brantley Jr.,<sup>3</sup> Chiea C. Khor,<sup>8</sup> Karen M. Joos,<sup>3</sup> Nancy J. Cox,<sup>1,4\*\*</sup>

1. *Genetic Medicine, Vanderbilt University School of Medicine, Nashville, TN, United States 37232.*

2. *Institute of Human Genetics, Friedrich-Alexander-Universität Erlangen-Nürnberg FAU, 91054 Erlangen, Germany*

3. *Vanderbilt Eye Institute, Vanderbilt University Medical Center, Nashville, TN, United States 37232.*

4. *Vanderbilt Genetics Institute, Nashville, TN, United States 37232*

5. *Clare Hall and MRC Epidemiology Unit, University of Cambridge, Cambridge CB2 0SL, United Kingdom*

6. *Biostatistics, Vanderbilt University School of Medicine, Nashville, TN, United States 37232.*

7. *Department of Ophthalmology, Universitätsklinikum Erlangen, Friedrich-Alexander-Universität Erlangen-Nürnberg, 91054 Erlangen, Germany*

8. *Genome Institute of Singapore, Singapore 138672*

Corresponding Authors: Jibril Hirbo\* [jibril.hirbo@vumc.org](mailto:jibril.hirbo@vumc.org); Nancy J. Cox\*\* [nancy.j.cox@vumc.org](mailto:nancy.j.cox@vumc.org)

1 **Abstract**

2

3 Exfoliation syndrome (XFS) is an age-related systemic disorder characterized by excessive  
4 production and progressive accumulation of abnormal extracellular material, with  
5 pathognomonic ocular manifestations. It is the most common cause of secondary glaucoma,  
6 resulting in widespread global blindness. We performed Transcriptomic Wide Association  
7 Studies (TWAS) using PrediXcan models trained in 48 GTEx tissues to identify genetically-  
8 determined gene expression changes associated with XFS risk, leveraging on results from a  
9 global GWAS that included 123,457 individuals from 24 countries. We observed twenty-eight  
10 genes in a three-Megabase chr15q22-25 region that showed statistically significant associations,  
11 which were further whittled down to ten genes after additional statistical validations. In  
12 experimental analysis of these ten genes, mRNA transcript levels for *ARID3B*, *CD276*, *LOXLI*,  
13 *NEO1*, *SCAMP2*, and *UBL7* were significantly decreased in iris tissues from XFS patients  
14 compared to control samples. Genes with genetically determined expression changes in XFS  
15 were significantly enriched for genes associated with inflammatory conditions. We further  
16 explored the health consequences of high susceptibility to XFS using a large electronic health  
17 record and observed a higher incidence of XFS comorbidity with inflammatory and connective  
18 tissue diseases. Our results implicate a role for connective tissues and inflammation in the  
19 etiology of XFS. Targeting the inflammatory pathway may be a potential therapeutic option to  
20 reduce progression in XFS.

21

## 1 **Introduction**

2 Exfoliation syndrome (XFS) is an age-related systemic disorder characterized by  
3 excessive production and progressive accumulation of abnormal extracellular material, with  
4 pathognomonic ocular manifestations.<sup>1,2</sup> It is the most common cause of secondary glaucoma,  
5 resulting in widespread global blindness.<sup>3</sup> In addition to ocular manifestations, exfoliation  
6 syndrome deposits have been observed in visceral organs, such as the lung, kidney, liver and  
7 gallbladder.<sup>2,4</sup> In addition to elastic tissue disorders, XFS has also been associated with increased  
8 risk of vascular diseases.<sup>5-7</sup> Associations of XFS to several systemic biomarkers of  
9 inflammation, including complement components and homocysteine, have also been reported.<sup>3,8,9</sup>

10 Genetic mechanisms have substantial influence on XFS etiology as evidenced in family  
11 and twin studies.<sup>10,11</sup> There have been eight genome-wide association studies (GWAS) of  
12 XFS,<sup>7,12-18</sup> three of which include meta-analysis,<sup>7,12,13</sup> that have cumulatively identified >60  
13 associated genetic variants. The largest meta-analysis of XFS involved >123,000 individuals  
14 (13,620 XFS cases, 109,837 controls) from 24 countries across six continents and identified  
15 seven loci with the strongest association signal in chromosome 15 near the lysyl oxidase-like 1  
16 gene (*LOXLI*). The signal on chr15 involved 54 potential causal variants. Overall, (i) two  
17 missense variants in *LOXLI*, rs1048661 (encoding *LOXLI* p.Leu141Arg) and rs3825942  
18 (p.Gly153Asp), are likely to confer risk of developing XFS, with very high heterogeneity across  
19 populations because the alleles show an effect reversal,<sup>12,13,16,19-22</sup> (ii) the associated variants in  
20 the locus showed population-specific frequency and linkage disequilibrium (LD) patterns,<sup>12,16,21</sup>  
21 (iii) haplotypes that carry the risk alleles depending on the population are correlated with reduced  
22 *LOXLI* expression levels, however, (iv) no clear functional effects for the haplotypes that  
23 represent the two variants have been shown.<sup>7,13,23,24</sup> The non-coding variants associated with

1 XFS at this chr15 locus could confer regulatory effects. Some of these non-coding variants  
2 regulate expressions of the sentinel *LOXLI* and the neighboring *STRA6* gene.<sup>7,25,26</sup>

3         After considering all the reports on genetic architecture of XFS to date, we hypothesize  
4 that analysis of the contribution of the genetically-determined component of gene expression to  
5 XFS risk can provide a powerful method to elucidate genes involved in XFS. We used a gene-  
6 based TWAS method, PrediXcan<sup>27</sup>, implemented on GWAS summary statistics (Summary  
7 PrediXcan; S-PrediXcan)<sup>28</sup> to identify genetically determined gene expression traits associated  
8 with disease risk. Models were trained on 48 GTEx tissues to estimate the correlation between  
9 genetically-determined gene expression and XFS risk, leveraging on XFS GWAS summary  
10 statistics from a previously reported multi-ethnic study.<sup>13</sup> The phenomenon of TWAS association  
11 with multiple signals within the same locus can be a statistical artifact of the correlation due to  
12 LD between SNPs that are separately predictive of the measured expression of physically  
13 colocated genes<sup>32</sup> hampering the ability to prioritize the true causal gene(s). To address this  
14 limitation, we performed sequential conditional analysis in each tissue, starting with the gene  
15 that was the strongest signal in the initial PrediXcan analysis. In addition, we sequentially rebuilt  
16 prediction models excluding variants in models of other genes in the loci that were in LD with  
17 any variants of the strongest signal. We also analyzed individual-level GWAS data from four  
18 additional European ancestry populations, two German, one Italian<sup>7</sup> and one American.<sup>27</sup> We  
19 followed these extensive statistical analyses by functional validation in human iris tissues of the  
20 prioritized top gene-level associations. Finally, to gain clinical insights into our findings, we  
21 explored the health consequences to individuals carrying high XFS genetic risk in a large  
22 biobank with links to electronic health records.

23

## 1 **Materials and Methods**

2 We used an extension of PrediXcan<sup>28</sup> that uses GWAS summary statistics, S-  
3 PrediXcan,<sup>11</sup> to analyze GWAS summary statistical data from a multi-ethnic GWAS study on  
4 XFS.<sup>13</sup> This dataset consisted of 13,620 XFS cases and 109,837 controls. We also performed  
5 PrediXcan on individual-level genetic data from two independent datasets comprising 4127 cases  
6 and 9075 controls. The first dataset comprised case and control samples from three cohorts of  
7 European ancestry (two from Germany and one from Italy). The second dataset comprised adult  
8 patients of European ancestry at Vanderbilt University Medical Center (VUMC) from the local  
9 communities surrounding Nashville, TN. The BioVU cases and controls were genotyped on five  
10 different Illumina genotyping arrays; Human660W-Quad, HumanOmni1-Quad, Infinium  
11 Omni5-4, OmniExpress-8v1-2-B and Infinium Multi-Ethnic Global-8 (MEGA). The data was  
12 processed using established GWAS quality control procedures<sup>8</sup>, and imputed on the Michigan  
13 Imputation server. Details on how subject selection for BioVU data and genotyping was  
14 performed is found in extended materials and methods section (**Supplemental Information**).

### 15 16 *Statistical Analysis*

17 We used the gene-based method, PrediXcan, that provides a framework for correlating  
18 imputed gene expression with phenotype.<sup>9</sup> Gene expression prediction models for 48 different  
19 human tissues were trained using GTEx v7 data, subsampled to use only the European ancestry  
20 samples. Models with non-zero weights that met a set significance criterion ( $r > 0.10$ ,  $q < 0.05$ )  
21 were retained.<sup>27</sup> Given the lack of eye tissue in the GTEx data, we performed PrediXcan analysis  
22 in all available tissues to leverage the shared regulatory architecture of gene expression across  
23 tissues.<sup>29</sup> We referred to the association analysis in each tissue between predicted expression and  
24 XFS as “single-tissue analysis.” Because XFS is considered a systemic disorder, we also

1 aggregated evidence across the different tissues to improve our ability to prioritize genes relative  
2 to a single unrelated tissue. We determined the joint effects of gene expression variation  
3 predicted across all 48 tissues using the Multi-Tissue PrediXcan (MultiXcan), a multivariate  
4 regression method that integrates evidence across multiple tissues taking into account the  
5 correlation between the tissues.<sup>30,31</sup> We refer to this association analysis as “multi-tissue  
6 analysis.”

7 We used S-PrediXcan<sup>28</sup> to analyze all GWAS summary statistic data from the multi-  
8 ethnic study of Aung, *et al.*<sup>13</sup>. Since the summary-based method has been shown to be  
9 conservative and tends to underestimate significance in cases where there is some linkage  
10 disequilibrium-structure mismatch between reference and study cohorts,<sup>28</sup> we retained and  
11 reported S-PrediXcan results that had a univariate S-PrediXcan  $P < 0.0001$ . We used Bonferroni  
12 adjustment for multiple hypothesis testing. Genome-wide significance for a gene-level  
13 association in single-tissue and multi-tissue PrediXcan analysis were defined as  $p < 2.02e-7$  and  
14  $p < 3.02e-6$ , respectively.

15

### 16 *Conditional Analysis and Linkage Disequilibrium Evaluation*

17 To determine whether multiple association signals within the same locus are due to  
18 independent causal genes or statistical artefacts of correlation in measured expression and  
19 predicted gene expression for adjacent genes,<sup>32</sup> we examined the correlation in the gene  
20 expression among genome-wide significant genes in the reference GTEx data. We assumed that  
21 there is concordance in correlation in measured and predicted gene expressions, but depending  
22 on the quality of our predictions, correlation in predicted expression for a pair of genes may be

1 missed. We verified the extent of LD in the 1000 genomes database<sup>33,34</sup> between variants in the  
2 prediction models for significantly associated genes in each tissue.

3 To measure potential regulatory effects of the two classical *LOXLI* missense variants in  
4 our PrediXcan analysis, we excluded them and all the variants in our gene models that were in  
5 LD with them (defined as pairwise  $r^2 > 0.1$ ) to generate “reduced models”. We predicted gene  
6 expression and performed association analysis using reduced models in both the global  
7 multiethnic and the European subset for the genes in chromosome 15 region. To assess whether  
8 the association signals in the chr15q22-25 region for each tissue are independent of the  
9 ‘classical’ *LOXLI* signal, we excluded variants in the prediction models of genes in the region  
10 that were in LD (pairwise  $r^2 > 0.1$ ) with any variant in the *LOXLI* model. In tissues without a  
11 *LOXLI* model (i.e.,  $r^2 > 0.10$ ,  $q < 0.05$ ), we excluded variants for chr15q22-25 region genes that  
12 were in LD ( $r^2 > 0.1$ ) with variants in the *STOMLI* models. In addition, we excluded variants that  
13 were shared between prediction models for genes in the region. In each case, we performed  
14 association analysis using the reduced models and compared the results with the original models.

15 To determine whether additional genes within the region were significantly associated  
16 with XFS, independently of the most highly associated genes (*LOXLI* and *STOMLI*) identified  
17 in the primary analysis, we performed conditional analysis using the actual individual-level  
18 genotype data that included our BioVU cohort and a subset of Aung, *et al.* consisting of three  
19 European ancestry cohorts. For each tissue with a significant association, the conditional analysis  
20 was performed on the gene that was the most statistically significant as identified from the initial  
21 PrediXcan analysis. We generated genetically determined expression for each individual in the  
22 dataset and then performed association analysis using Genetic Association Analysis Under  
23 Complex Survey Sampling (SUGEN: version 8.8)<sup>35</sup> on the individual imputed gene expression

1 data, including age, sex, first 5 principal components and relatedness in the regression model. A  
2 new logistic regression model was then fit to the case-control data by sequentially adjusting for  
3 the expression data of the top significant signals as a covariate. We then performed a meta-  
4 analysis for the PrediXcan summary statistics from the four datasets. We repeated this procedure  
5 until no genes in the region attained our threshold for statistical significance in the tissues tested  
6 ( $<0.05/\text{total \# of e-genes} \times \text{\# of tissues tested}$  for each top round of tests).

### 7 8 *Enrichment and pathway analysis*

9 Genes that were predicted to be associated with XFS at genome-wide significance in both  
10 single-tissue and multi-tissue analysis, and at nominal significance ( $p < 0.05$ ) in single-tissue  
11 analysis were checked for enrichment of particular categories in several databases using the web-  
12 based enrichment tools, Enrichr.<sup>36,37</sup> This was done by using the strongest signal at nominal  
13 significance across the 48 tissues for each of the genes analyzed in PrediXcan. Enrichr  
14 implements Fisher's exact test and uses over 100 gene set libraries to compute enrichment.<sup>36</sup> We  
15 also performed rank-based Gene Set Enrichment Analysis (GSEA) using another web-based  
16 enrichment tool, 2019 Webgestalt<sup>38-41</sup> with a more recent database (Gene Ontology January  
17 2019, KEGG Release 88.2, Reactome ver.66 September 2018 and PANTHER v3.6.1 Jan 2018)  
18 and the current Reactome database ver. 69 (June 12 2019).<sup>42</sup> In this case the strongest signal in  
19 the PrediXcan result across the 48 tissues for each of the genes analyzed was used. Based on  
20 previous studies indicating limitation in accurately quantifying expression effects of variants in  
21 highly polymorphic regions,<sup>43,44</sup> we also performed enrichment analysis after excluding a total of  
22 310 genes in ~6 Mb chromosomes 6 HLA region (hg19 28Mb-34Mb) that encompassed *GPX6* –  
23 *CUTA* genes (238 genes) and ~2.5Mb chromosome 17 region that encompassed *CCDC43* –



1 *NPPEPS* that include the 900 kb inversion common in population of European ancestries (72  
2 genes).

### 3 *Quantitative Expression Validation Analysis*

#### 4 Human tissues

5 Human donor eyes used for corneal transplantation with appropriate research consent  
6 were obtained from donors of European ancestry. Eyes were processed within 20 hours after  
7 death. Informed consent to tissue donation was obtained from the donors or their relatives. The  
8 protocol of the study was approved by the Ethics Committee of the Medical Faculty of the  
9 Friedrich-Alexander-Universität Erlangen-Nürnberg (No. 4218-CH) and adhered to the tenets of  
10 the Declaration of Helsinki for experiments involving human tissues and samples.

11 For RNA and DNA extractions, 12 donor eyes with manifest XFS syndrome (mean age,  
12 77±9 years) and 19 normal-appearing control eyes without any known ocular disease (mean age,  
13 74±6 years) were used. All individuals who donated the XFS tissues were previously confirmed  
14 XFS patients through routine ophthalmologic examination after pupillary dilation. The presence  
15 of characteristic XFS material deposits in manifest disease was assessed by macroscopic  
16 inspection of anterior segment structures and confirmed by electron microscopic analysis of  
17 small tissue sectors. Iris tissues were prepared under a dissecting microscope and rapidly frozen  
18 in liquid nitrogen.

#### 19 Real-time PCR

20 For quantitative real-time PCR, iris tissues were extracted using the Precellys 24  
21 homogenizer and lysing kit (Bertin, Montigny-le-Bretonneux, France) together with the AllPrep  
22 DNA/RNA kit (Qiagen, Hilden, Germany) according to the manufacturer's instructions

1 including an on-column DNaseI digestion step using the RNase-free DNase Set (Qiagen). First-  
2 strand cDNA synthesis and PCR reaction was performed as previously described.<sup>45</sup> Exon-  
3 spanning primers (Eurofins Genomics, Ebersberg, Germany), designed with Primer 3 software  
4 (<http://bioinfo.ut.ee/primer3/>), are summarized in **Suppl. Table S1**. Quantitative real-time PCR  
5 was performed using the CFX Connect thermal cycler and software (Bio-Rad Laboratories,  
6 München, Germany). Probes were run in parallel and analysed with the  $\Delta\Delta C_t$  method. Averaged  
7 data represent at least three biological replicates. Unique binding was determined with UCSC  
8 BLAST search (<https://genome.ucsc.edu/>) and amplification specificity was checked using melt  
9 curve, agarose gel and sequence analyses with the Prism 3100 DNA-sequencer (Applied  
10 Biosystems, Foster City, CA). For normalization of gene expression levels, mRNA ratios relative  
11 to the house-keeping gene GAPDH were calculated.

12 Group comparisons were performed using a Mann-Whitney U test using SPSS v.20 software (IBM,  
13 Ehningen, Germany).  $P < 0.05$  was considered statistically significant.

14

#### 15 *Testing for Comorbidity/Pleiotropy*

16 To determine the comprehensive health consequences of high genetic risk to XFS, we  
17 performed a phenome-wide association study (PheWAS).<sup>46</sup> First, we examined the comorbidity  
18 of other phecodes with XFS (365.5 – ICD9 365.52/ICD10 H40.14xx) in a total of 752,024  
19 individuals in the VUMC EHR (418,371 females and 333,653 males), by performing logistic  
20 regression analysis conditioned on gender, age and the self-reported ancestry as covariates in the  
21 regression model. For this analysis we used a total of 600,107 European, 103,209 African,  
22 12,411 Asian and 36,297 other ancestry patients, of which 222 were uncurated XFS cases (coded  
23 as 1) and the rest controls. To determine other health consequences of high genetic risk to XFS,

1 we performed a PheWAS analysis<sup>30</sup> (n=52,251) on the polygenic risk score generated from the  
2 Aung *et al*'s<sup>13</sup> XFS global dataset against patients genotyped on Illumina Mega-array chip in  
3 BioVU with about 18k ICD-9 /ICD-10 codes, accounting for age, gender, and the first 5  
4 principal components.  
5

## 1 **Results**

### 2 *PrediXcan Analysis*

3 We performed single-tissue PrediXcan analysis of the global multi-ethnic GWAS (13,620  
4 XFS cases and 109,837 controls) summary data, identifying 23 genes (defined as signals with  
5  $P < 2.02 \times 10^{-7}$  after Bonferroni corrections) on chromosome 15: *CYP1A2*, *CYP1A1*, *STOML1*,  
6 *LOXL1*, *ISLR2*, *RPP25*, *INSYN*, *ISLR*, *STRA6*, *CD276*, *NEO1*, *ARID3B*, *COX5A*, *PML*, *CPLX3*,  
7 *LMAN1L*, *UBL7*, *MPI*, *CLK3*, *CSK*, *SEMA7A*, *TBC1D21*, and *NPTN* (**Figure 1a, Suppl. Table**  
8 **S2**).

9 To determine the joint effects of gene expression variation predicted across all 48 tissues  
10 analyzed, we performed a multivariate regression multi-tissue analysis. Each of the 23  
11 associations from the single-tissue PrediXcan analysis remained significant in multi-tissue  
12 analysis (**Suppl. Table S3**). Additionally, five genes within the same region that were associated  
13 with XFS at subgenome-wide significance in the single-tissue analysis ( $p < 3.02 \times 10^{-6}$ ) were  
14 associated in the multi-tissue analysis: *ADPGK* ( $p = 7.32 \times 10^{-7}$ ), *CYP11A1* ( $p = 1.36 \times 10^{-16}$ ), *HEXA*  
15 ( $p = 1.03 \times 10^{-6}$ ), *PARP6* ( $p = 1.82 \times 10^{-6}$ ), *SCAMP2* ( $p = 1.65 \times 10^{-10}$ ). All genes mapped to chromosome  
16 region 15q22-25, spanning ~3 Megabases (**Figure 1b**).

17 Seven additional genes located on chromosomes 1 (*LGR6*  $p = 2.20 \times 10^{-6}$ ; *SDHB*  $p = 8.07 \times 10^{-8}$ ),  
18 6 (*PRRT1*  $p = 9.10 \times 10^{-7}$ ), 8 (*PRSS55*  $p = 4.18 \times 10^{-13}$ ), 10 (*CDH23*  $p = 1.86 \times 10^{-7}$ ; *PITRM1*  
19  $p = 8.45 \times 10^{-12}$ ) and 19 (*CALM3*  $p = 2.60 \times 10^{-7}$ ), were significantly associated in the multi-tissues  
20 analysis (**Figure 1a, Suppl. Table S3**). All seven signals mapped to genomic regions harboring  
21 GWAS SNP variants showing subgenome-wide significance with XFS risk, except for *PRRT1*,  
22 which corresponds to the *AGPAT1* locus.<sup>13</sup> The data indicates that combining information across  
23 variants in genes and then across tissue expression improves the power to identify additional  
24 XFS-associated loci.

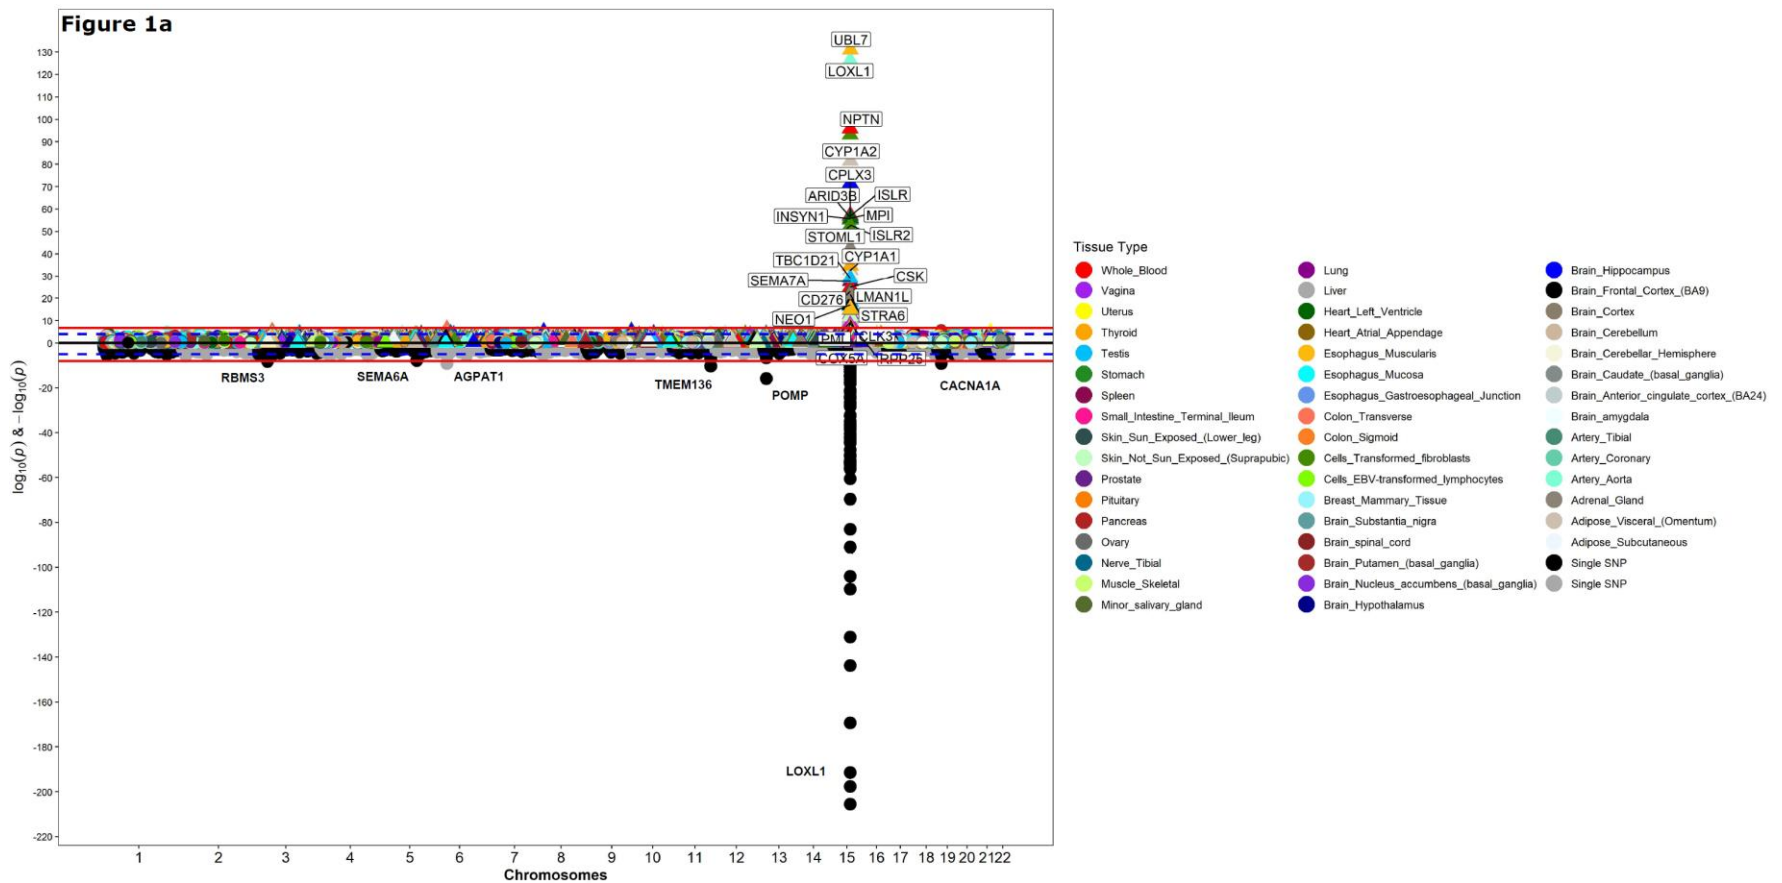

1

2 **Figure 1b: Manhattan plot for GWAS meta-analysis and PrediXcan analysis of the genotyping data for XFS.** The lower half of the plot is  
 3 for the XFS meta-analysis summary statistics data Aung *et al.*, 2017, while the upper half of the plot shows results from PrediXcan analysis for 48  
 4 GTEx tissues. On the X axis is plot of variant/gene associations along the chromosomes, while Y axis represent the significance levels for the  
 5 associations. The legend for PrediXcan analysis on the 48 GTEx tissues, a color for each tissue, is on the right. For both plots the blue dotted line  
 6 is the “suggestive” genome-wide significant threshold ( $p < 1e-4$ ), while the red line is the genome-wide significant threshold. On the lower plot, the  
 7 gene labels are for genes reported/mapped to genome-wide significant signals in GWAS result, while in the upper plot is for genes that are  
 8 associated at genome-wide significant threshold. For genes associated with XFS at genome-wide threshold in more than one tissues, only the  
 9 tissue with lowest p-value is labeled. The GWAS plot has been truncated to  $p < 1e-220$  for clarity.

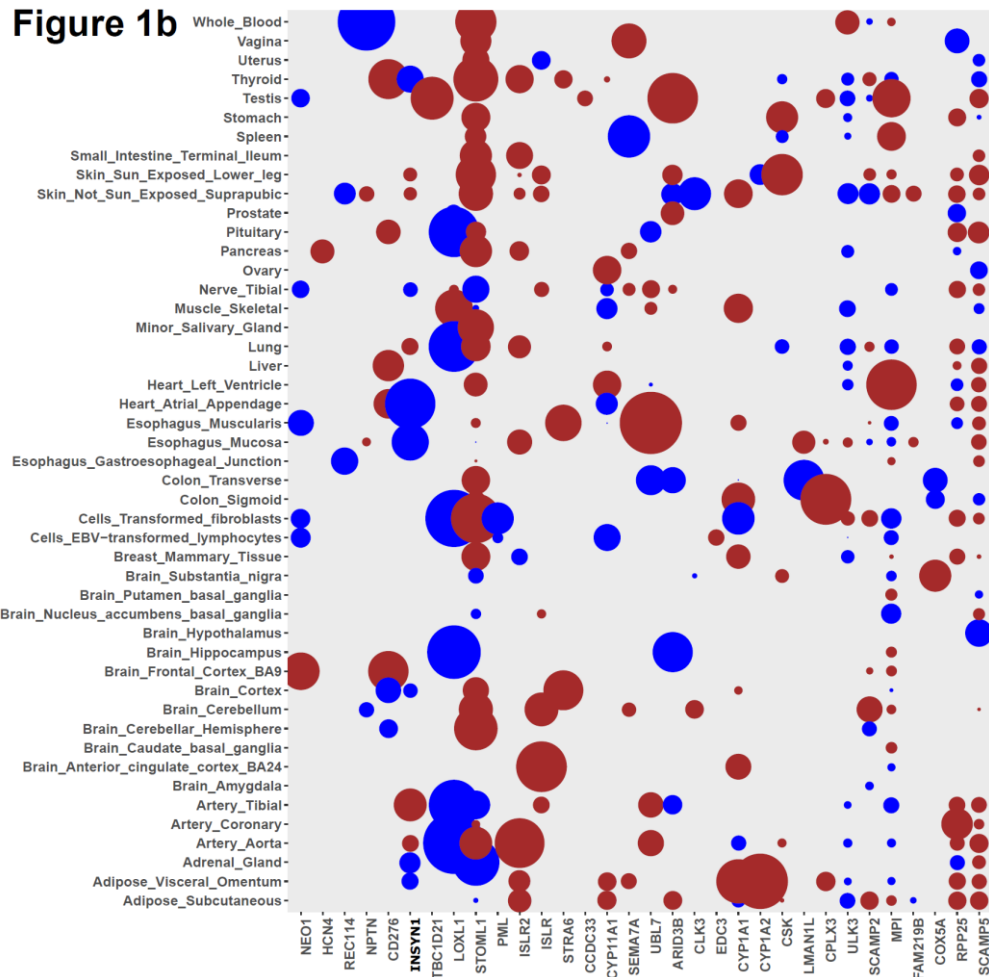

1  
2  
3  
4  
5  
6

**Figure 1b: Chromosome 15q22-25 region genes that show significant association with XFS.** The size of the balloon for each gene-tissue association is proportional to  $-\log_{10}(p\text{-value})$  and color corresponds to the predicted direction of expression changes: dark-red and blue for increased and decreased expression changes, respectively. Only four genes (EDC3, ULK3, HCN4 & FAM219B) in the whole region were not associated with XFS.

1 To ensure that the association observed at the 23 genes from the larger multi-ethnic  
 2 dataset was not an artefact of population structure, we confirmed the signals in a subset of  
 3 European ancestry individuals (**Materials and Methods**). Twelve out of the 23 genes in  
 4 chr15q22-25 region (ten in the single-tissue analysis and two in the multi-tissue analysis)  
 5 remained genome-wide significant in this European ancestry analysis, whilst the remaining 11  
 6 genes remain nominally associated ( $p < 0.05$ ) (**Table 1, Suppl. Figure S3, Suppl. Table S4, S5,**  
 7 **S6**).

8 **Table 1: Confirmation of PrediXcan analysis of global dataset in European ancestry individuals**

9

| Chromosome | Genes associated with XFS                                                                                                                                                                                                                                                                                                                                                                                                                                                                                                                                                                                                                                                                                                                                                                                                                                |
|------------|----------------------------------------------------------------------------------------------------------------------------------------------------------------------------------------------------------------------------------------------------------------------------------------------------------------------------------------------------------------------------------------------------------------------------------------------------------------------------------------------------------------------------------------------------------------------------------------------------------------------------------------------------------------------------------------------------------------------------------------------------------------------------------------------------------------------------------------------------------|
| chr1       | <a href="#">LGR6</a> ; <a href="#">SDHB</a>                                                                                                                                                                                                                                                                                                                                                                                                                                                                                                                                                                                                                                                                                                                                                                                                              |
| chr6       | <a href="#">PRRT1</a>                                                                                                                                                                                                                                                                                                                                                                                                                                                                                                                                                                                                                                                                                                                                                                                                                                    |
| chr8       | <a href="#">PRSS55</a>                                                                                                                                                                                                                                                                                                                                                                                                                                                                                                                                                                                                                                                                                                                                                                                                                                   |
| chr10      | <a href="#">PITRM1</a> *; <a href="#">CDH23</a>                                                                                                                                                                                                                                                                                                                                                                                                                                                                                                                                                                                                                                                                                                                                                                                                          |
| chr11      | <a href="#">TMEM136</a>                                                                                                                                                                                                                                                                                                                                                                                                                                                                                                                                                                                                                                                                                                                                                                                                                                  |
| chr15      | <a href="#">SEMA7A</a> ***; <a href="#">STOML1</a> ***; <a href="#">ADPGK</a> ; <a href="#">MPI</a> ***; <a href="#">HEXA</a> *; <sup>ev</sup> <a href="#">LOXL1</a> ***; <a href="#">CPLX3</a> *; <a href="#">INSYN1</a> ***; <a href="#">SCAMP5</a> ***; <a href="#">ISLR</a> ***; <a href="#">CYP11A1</a> *; <a href="#">NPTN</a> *; <a href="#">CSK</a> ***; <a href="#">NEO1</a> *; <sup>ev</sup> <a href="#">UBL7</a> ***; <sup>ev</sup> <a href="#">CD276</a> ***; <a href="#">STRA6</a> **;<br><a href="#">PARP6</a> *; <a href="#">LMAN1L</a> ***; <a href="#">ISLR2</a> *; <sup>ev</sup> <a href="#">ARID3B</a> *; <a href="#">CLK3</a> *; <a href="#">PML</a> *; <sup>ev</sup> <a href="#">SCAMP2</a> ***; <a href="#">TBC1D21</a> ;<br><a href="#">CYP1A2</a> *; <a href="#">CYP1A1</a> ***; <a href="#">RPP25</a> ; <a href="#">ULK3</a> ** |
| chr16      | <a href="#">CDYL2</a> **                                                                                                                                                                                                                                                                                                                                                                                                                                                                                                                                                                                                                                                                                                                                                                                                                                 |
| chr19      | <a href="#">CALM3</a>                                                                                                                                                                                                                                                                                                                                                                                                                                                                                                                                                                                                                                                                                                                                                                                                                                    |

10  
 11 **Genes associated with XFS in single tissues analysis at genome-wide significance threshold ( $< 2.02e-7$ ) in**  
 12 **global GWAS summary statistic**

13 **Genes reported or mapped to variants associated with XFS in GWAS**

14 **Gene associated with XFS in cross-tissue analysis ( $< 9.5e-6$ ) and in single tissues analysis at suggestive significance**  
 15 **threshold ( $< 1e-4$ ) in global GWAS summary statistics.**

16 Significance values in European ancestry data single tissue analysis of genes associated with XFS  
 17 \*\*\*pvalue  $< 2.02e-7$ , \*\* pvalue  $< 1e-4$ , \* pvalue  $< 0.05$

18 Underlined genes are those associated with XFS in global dataset but no association in European ancestry data at  
 19 even nominal threshold ( $< 0.05$ )

20 *Additional genes associated with XFS in cross-tissue analysis of European ancestry data but not in global dataset.*

21 <sup>ev</sup>Genes experimentally validated by rtPCR in diseased XFS versus control normal iris eye tissues

## 1 *Correlated Expression Among Significant Genes*

2 To determine whether the 23 observed association gene signals were artefacts of LD  
3 contamination, we performed extensive additional analyses. We calculated the pair-wise  
4 correlation in measured expression among the significant genes, using the reference GTEx panel.  
5 We checked the relationship between expression correlation for each of the chr15p22-25 genes  
6 with *LOXLI* and *STOMLI* and the PrediXcan associations for the two genes in each tissue. We  
7 made two important observations from this analysis. First, there was a significant correlation  
8 between the correlation of measured gene expression of the other genes in chr15p22-25 with  
9 *LOXLI* or *STOMLI* and the gene-level associations with XFS in most tissues (**Suppl. Table S7a,**  
10 **Suppl. Figure S4a**). Secondly, there is substantial correlation between *STOMLI* and *LOXLI* ( $r^2$   
11 = 0.67,  $p=0.009$ ) (**Suppl. Table S7a, Suppl. Figure S4a**). These results indicate that the  
12 associations by one of the genes might be due to LD contamination or the presence of shared  
13 variants in the prediction models of the two genes (**Suppl. Table S8**).

14 To dissect the potential source of LD contamination in the PrediXcan analysis, we looked  
15 into the effect of the two GWAS missense variants implicated in XFS that have mostly been  
16 linked to *LOXLI* and shown to play regulatory roles,<sup>23</sup> followed by the effect of *LOXLI* and  
17 *STOMLI* signals on chr15q22-25 region observed associations in each tissue. We also  
18 determined the effect of shared variants between prediction models for the genes in the region.

19 We modified our prediction models by excluding: i) rs3825942 missense variant, ii)  
20 rs4886776 intronic variant, which is at near perfect LD (pair-wise,  $r^2=0.982$ ) with the rs1048661  
21 missense variant, and iii) all the variants in our gene models that were in LD with the two  
22 variants ( $r^2 > 0.1$ ). The two missense variants had wide ranging effect on the genetically  
23 predicted expression of many chr15q22-25 region genes, with the largest effect on *LOXLI*. The  
24 strength of the association signals diminished in six of the nine tissues for which we had the



1 gene's predicted expression. Association signals in three of these tissues fell below genome-wide  
2 threshold in the global dataset (**Suppl. Table S7b**). In addition, association signals for seven  
3 additional genes in the region besides *STOMLI* lost genome-wide significance; *CD276* (2  
4 tissues), *COX5A*, *CYP1A1*, *LMAN1L*, *MPI*, *SCAMP2* and *TBC1D21*.

5 Interestingly, association signals for eight genes were strengthened, four of which  
6 attained genome-wide significance threshold in reduced models: *INSYNI*, *CYP1A1*, *NPTN* and  
7 *LOXLI* (**Suppl. Table S7b**). These shifts in association strength, i.e., an increase in effect size,  
8 seem to be due to the exclusion of select variants (**Suppl. Tables S7c, S7d**). Moreover, the shifts  
9 in association strength are correlated with the excluded variants' level of LD with the missense  
10 variant rs3825942 ( $r^2 = 0.64$ ) (**Suppl. Tables S7c, S7d**). Notably, the three GWAS variants  
11 identified to have effect reversal in South Africans relative to other populations were in high LD  
12 with rs3825942 (**Suppl. Table S7g**).<sup>47</sup> Our results indicate that the missense variants have  
13 enhancing or diminishing effects on the PrediXcan association signals, in chr15q22-25, with  
14 XFS, consistent with allele reversal reported for the GWAS variants.<sup>13</sup>

15 To check whether the association signals in the chr15q22-25 region for each tissue were  
16 independent of the 'sentinel' *LOXLI* signal, we excluded, from the prediction models, variants  
17 that were in LD ( $r^2 > 0.1$ ) with any variants in *LOXLI* or *STOMLI* tissue models. We also  
18 excluded variants that were shared between two or more genes in their original prediction  
19 models. Seven of the genes that were associated with XFS at genome-wide threshold in their  
20 original models showed diminished signals, including four below significance levels: *UBL7*,  
21 *ISLR*, *LMAN1L* and *COX5A* in reduced models (**Suppl. Table S7e**). Association signals for  
22 *CYP1A1* and *CYP1A2* were slightly diminished in reduced models relative to the original  
23 models, but remained at significant genome-wide thresholds (**Suppl. Table S7e**). However,

1 association signals for six genes strengthened, four of which attained genome-wide association  
2 significance levels in the reduced models: *INSYNI*, *CLK3*, *CYP1A1* and *NEO1* (**Suppl. Table**  
3 **S7e**). These shifts in association strength seem to be due to few variants that are either in LD  
4 with variants in *LOXLI* and *STOMLI* models or are shared with other genes' models (**Suppl.**  
5 **Tables S7e, S7f**). However, these variants causing the shifts in association signals upon  
6 exclusion from the models, were not in LD with the missense rs3825942 variant (**Suppl. Table**  
7 **S7g**). This indicates that there are signals of allele reversal independent of the known missense  
8 variants in *LOXLI*.

9 Excluding variants that are in LD with SNPs in the *LOXLI/STOMLI* models did not have  
10 any effect on the association signals for six genes that were associated with XFS at genome-wide  
11 threshold in the original models: *CSK*, *STRA6*, *CD276*, *ARID3B*, *MPI* & *TBC1D21*, with the  
12 latter three in testis, for which we had no models for both *LOXLI* and *STOMLI* (**Suppl. Table**  
13 **S7e**). The results indicate that some of the observed signals were artefacts of LD contamination  
14 from *LOXLI* and *STOMLI* (*ISLR*, *LMANIL* and *COX5A*), while some of the signals were  
15 masked in the original models (*INSYNI*, *CLK3*, *CYP1A1* and *NEO1*). There was inconsistent  
16 result for *UBL7*, where there was no effect in its association signal in a tissue, enhanced effect in  
17 another tissue, and diminished signal in two other tissues, one of which went below the genome-  
18 wide threshold, albeit the reduced model had only a single variant in the prediction (**Suppl.**  
19 **Table S7e**).

20  
21  
22  
23  
24

1 *Conditional Analysis*

2           Conditional analysis was performed in tissues with any genome-wide significant  
3 chr15p22-25 region gene signals against the predicted gene expression for the strongest observed  
4 signals in the European subset. As in the global dataset, the strongest signals in the European  
5 dataset were at *LOXLI* (**Table 1, Suppl. Figure S3**). In all nine of the 48 tissues with *LOXLI*  
6 predicted expression, only the *STOML1* gene showed a significant association signal (in addition  
7 to *LOXLI*) (**Table 1, Suppl. Figure S3**). After conditioning on *LOXLI* in these tissues, the  
8 *STOML1* signal disappeared, but association signals at *SCAMP2* and *INSYNI* were observed in  
9 artery-aorta and lung tissues, respectively (**Suppl. Table S8, Figure 2a, 2b**). This indicated that  
10 the association of *STOML1* with XFS is an artefact of a strong *LOXLI* signal, consistent with  
11 *LOXLI* being the true signal and *STOML1* a proxy signal. In addition, association signals for  
12 *SCAMP2* and *INSYNI* were masked by the *LOXLI* signal.

13

1 **Figure 2a, 2b: Conditional analysis to prioritize XFS associated genes:** Manhattan plot for PrediXcan analysis of European ancestry  
 2 individuals in tissues with predicted gene expression for a) LOXL1 and b) conditioned on LOXL1 predicted gene expressions In each case on the  
 3 X axis is plot of variant/gene associations along the chromosomes, while Y axis represent the significance levels for the associations. The legend  
 4 for PrediXcan analysis on the GTEx tissues, a color for each tissue, is on the right. For both plots the blue dotted line is the “suggestive” genome-  
 5 wide significant threshold ( $p < 1e-4$ ), while the red line is the genome-wide significant threshold. On the lower plot, the gene labels are for genes  
 6 reported/mapped to genome-wide significant signals in GWAS result, while in the upper plot is for genes that are associated at genome-wide  
 7 significant threshold. For genes associated with XFS at genome-wide threshold in more than one tissues, only the tissue with lowest p-value is  
 8 labeled.

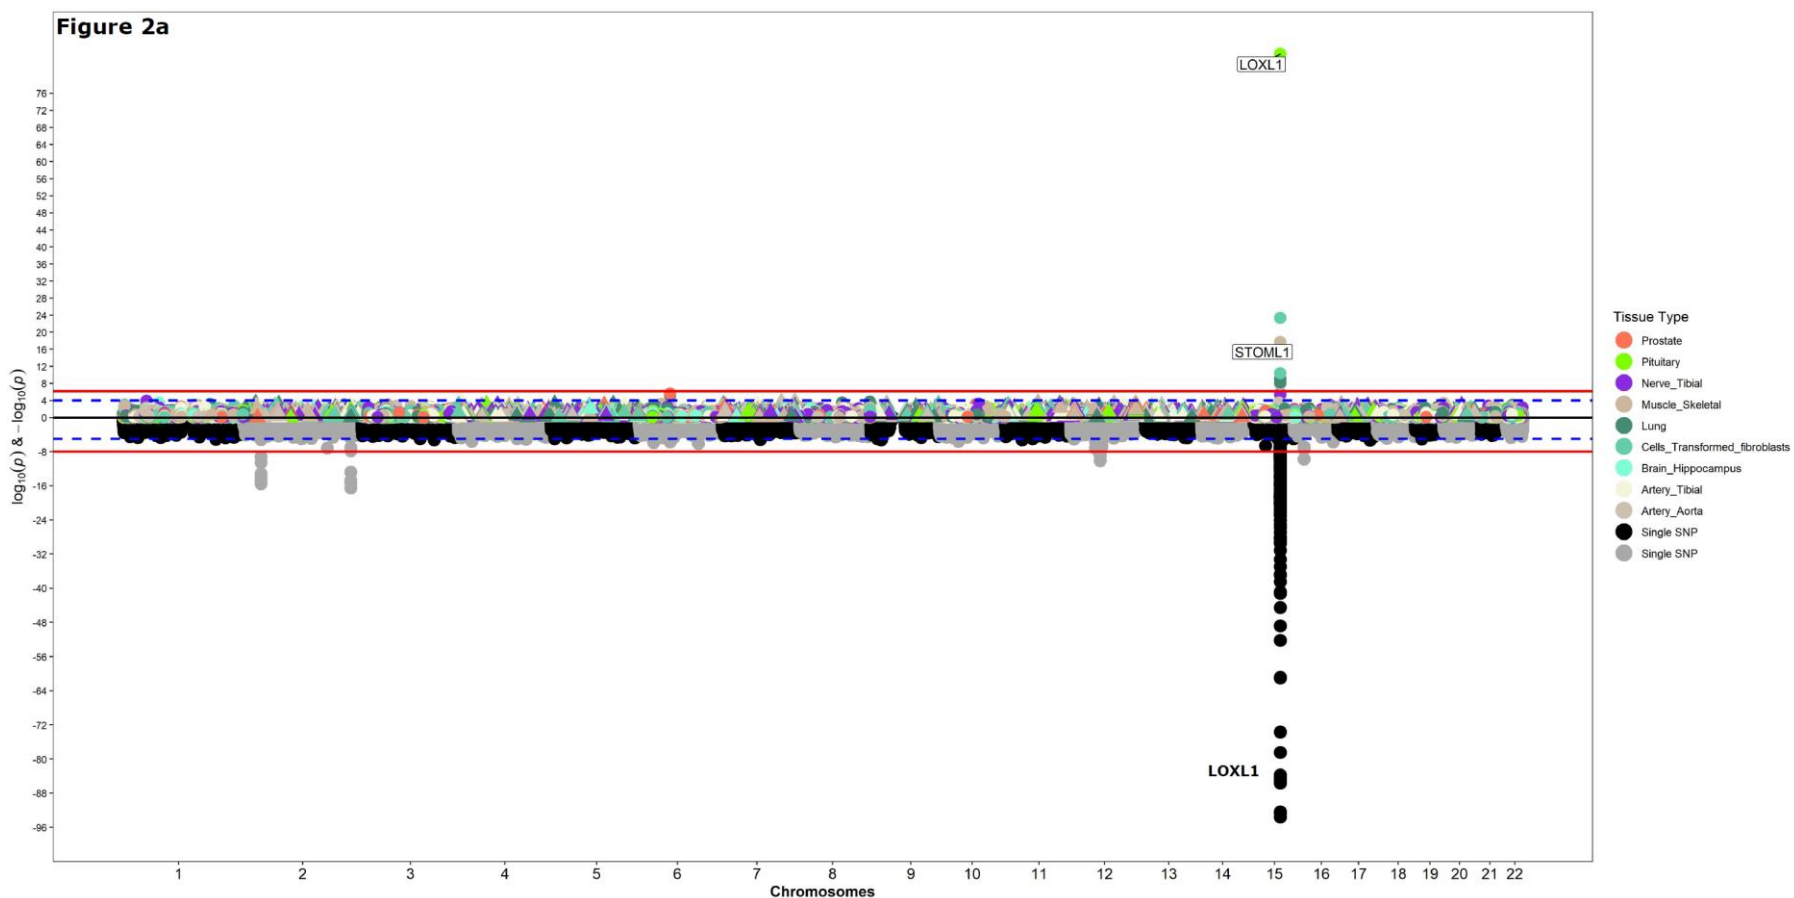

9

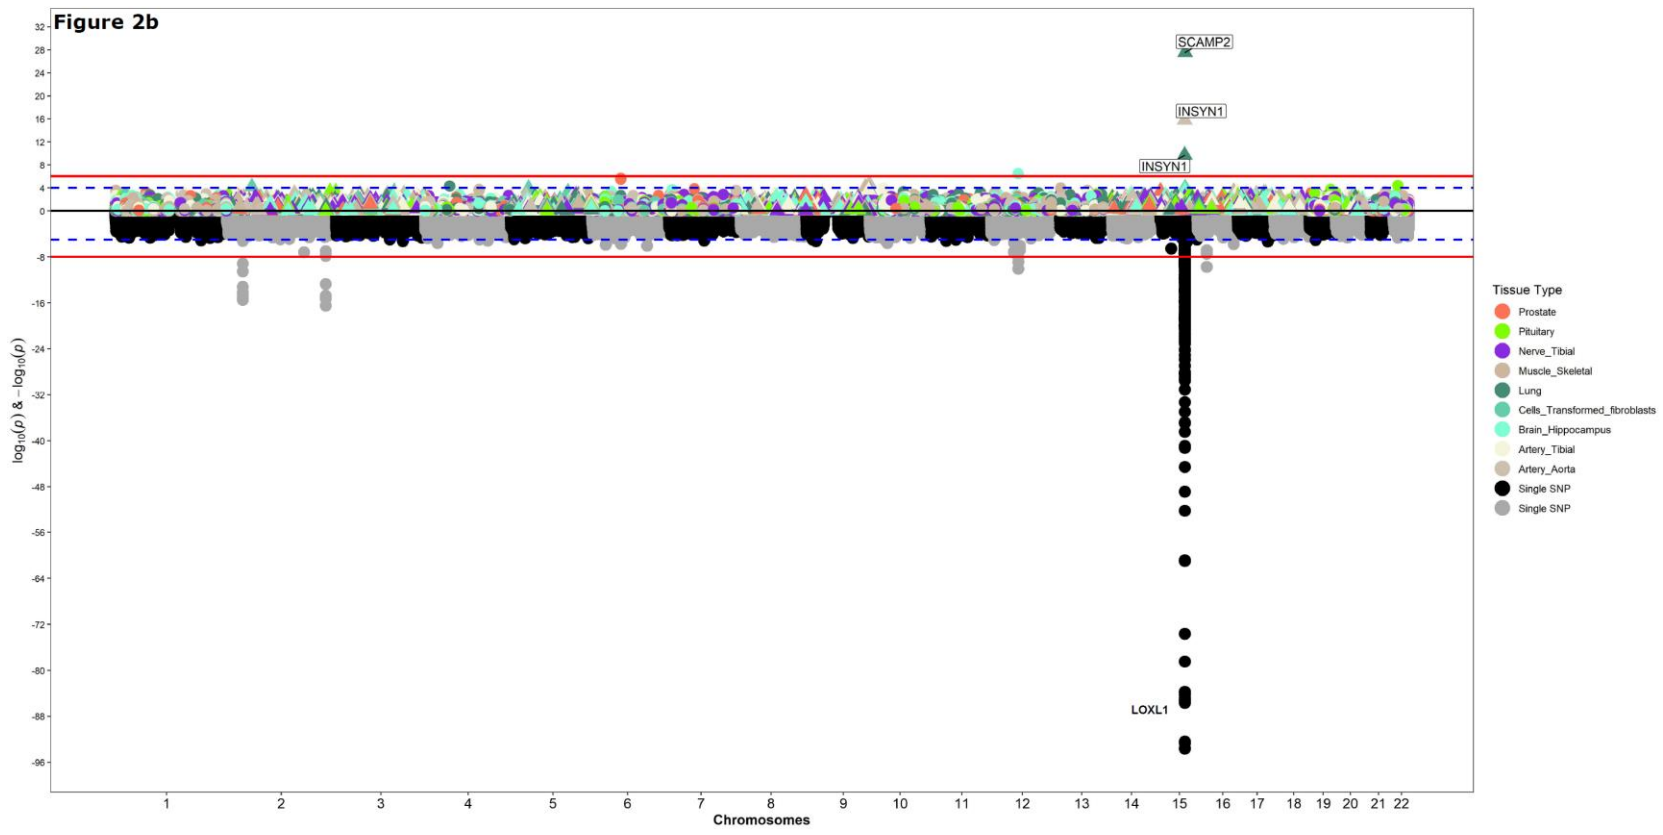

1  
2  
3  
4  
5  
6

1            In 17 tissues with *STOML1* predicted gene expression, we observed significant  
2 association signals for 8 other genes (in addition to *STOML1*) (**Suppl. Table S8, Figure 2c, 2d**).  
3 After conditioning on *STOML1* predicted gene expression, associations with four genes  
4 (*CYP1A1*, *INSYN*, *LOXL1*, *SCAMP2*) remained, while association with four other genes (*ISLR*,  
5 *LMANIL*, *MPI* & *SEMA7A*) disappeared, consistent with the role of gene expression correlation  
6 in our ability to ascertain true association (**Figures 2e-2g**). In addition, associations with five  
7 more genes (*ARID3B*, *CPLX3*, *CYP1A2*, *PML* & *UBL7*) attained genome-wide significance after  
8 the conditional analysis.

9

1 **Figure 2c-2g: Conditional analysis to prioritize XFS associated genes:** Manhattan plot for PrediXcan analysis of European ancestry individuals  
2 in tissues with predicted gene expression for STOML1 (2c) and plot of analysis conditioned on STOML1 predicted gene expressions (2d). **Figure**  
3 **2e)** correlation in gene expression in for genes in chr15q22-25 in lung tissue for i) reference GTEx data f) predicted gene expression in BioVU  
4 cohort. In each case on the X axis is plot of variant/gene associations along the chromosomes, while Y axis represent the significance levels for the  
5 associations. The legend for PrediXcan analysis on the GTEx tissues, a color for each tissue, is on the right. For both plots the blue dotted line is  
6 the “suggestive” genome-wide significant threshold ( $p < 1e-4$ ), while the red line is the genome-wide significant threshold. On the lower plot, the  
7 gene labels are for genes reported/mapped to genome-wide significant signals in GWAS result, while in the upper plot is for genes that are  
8 associated at genome-wide significant threshold. For genes associated with XFS at genome-wide threshold in more than one tissues, only the  
9 tissue with lowest p-value is labeled. g) linkage disequilibrium between variants in prediction models for LOXL1 and other chr15q22-25 genes  
10 associated with XFS in lung tissue based on pairwise  $r^2$  and  $D'$  parameters. Relative genome location for variants in each gene models are roughly  
11 demarcated by diagonal lines next to gene symbols. Proximate location for the variant shared between LOXL1 and STOML1, rs12102019 is  
12 labelled.

13

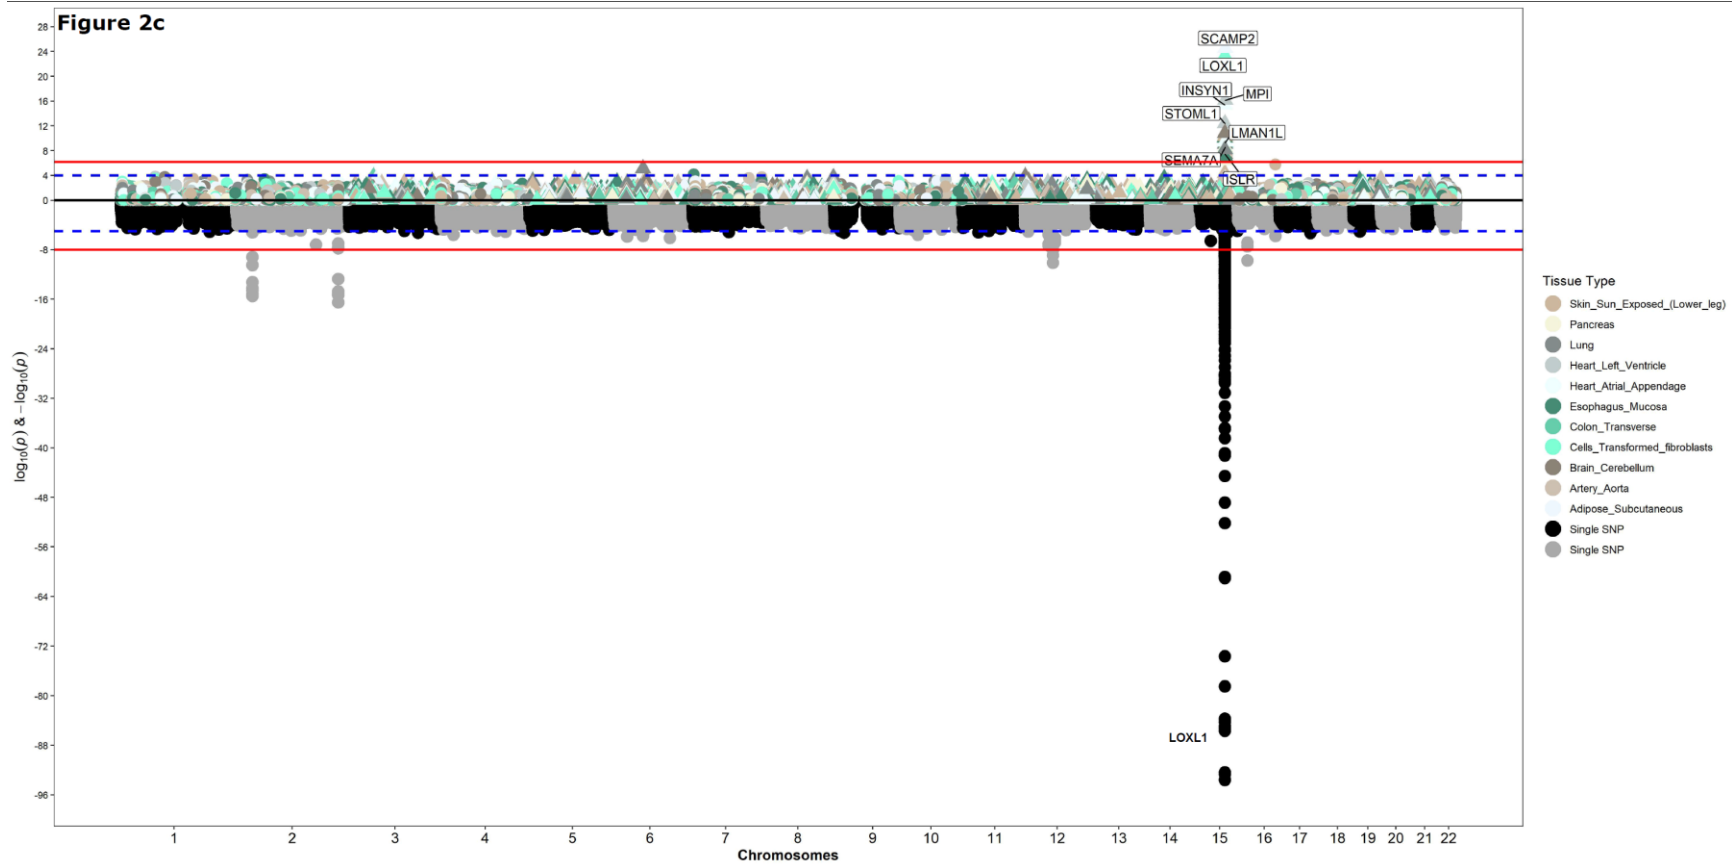

1  
2  
3  
4  
5  
6  
7



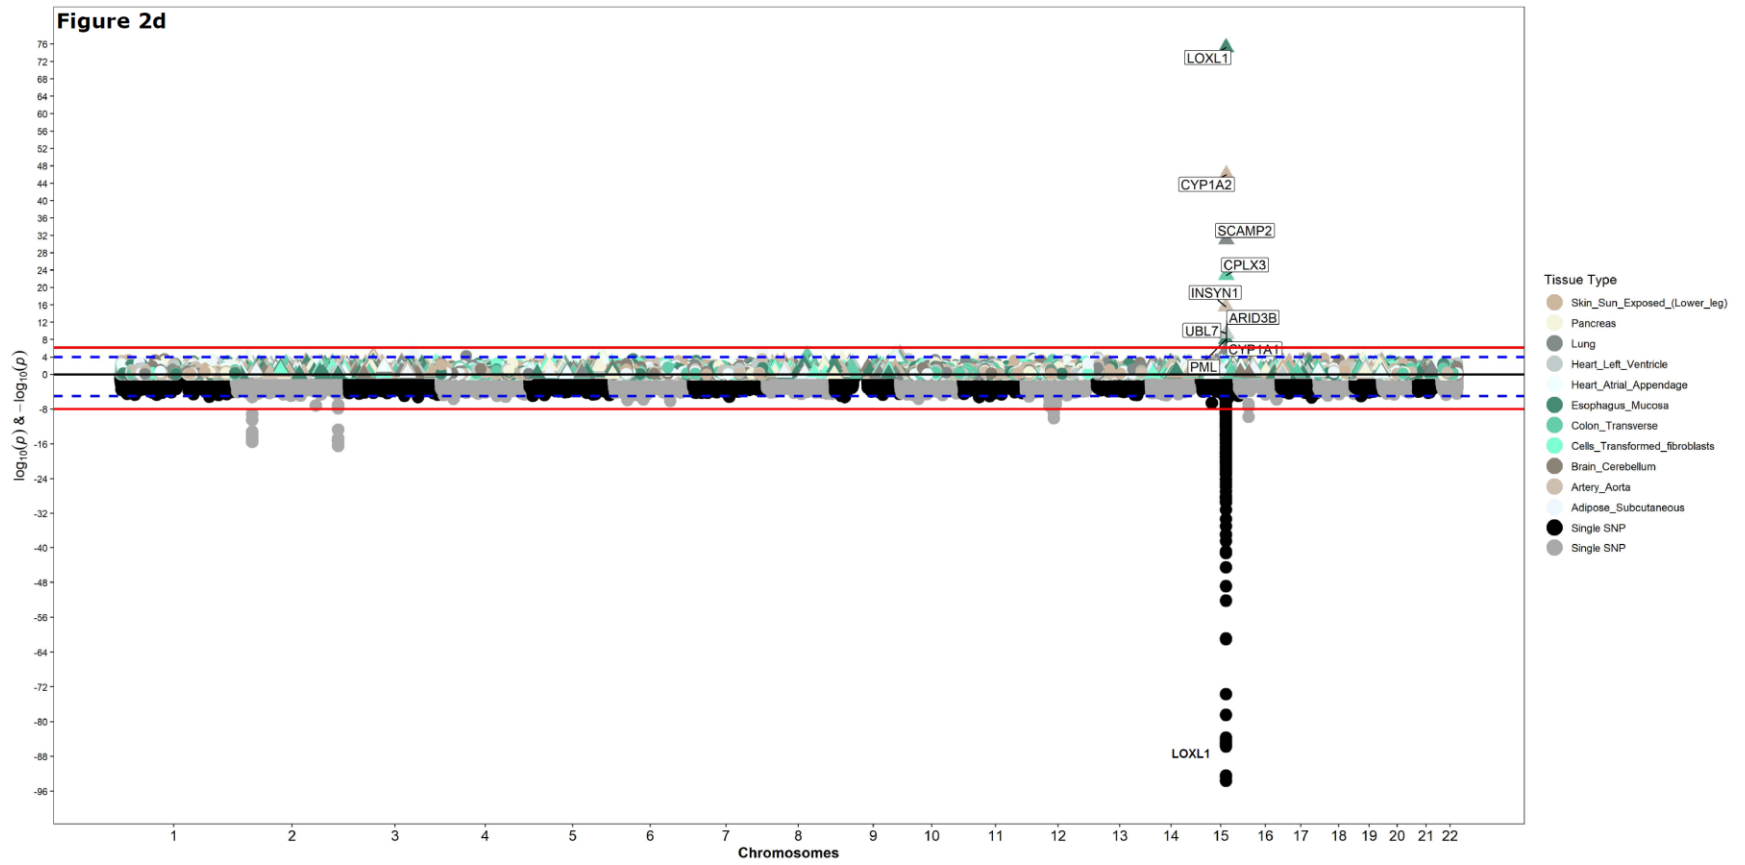

1  
2  
3  
4  
5  
6  
7

**Figure 2e**

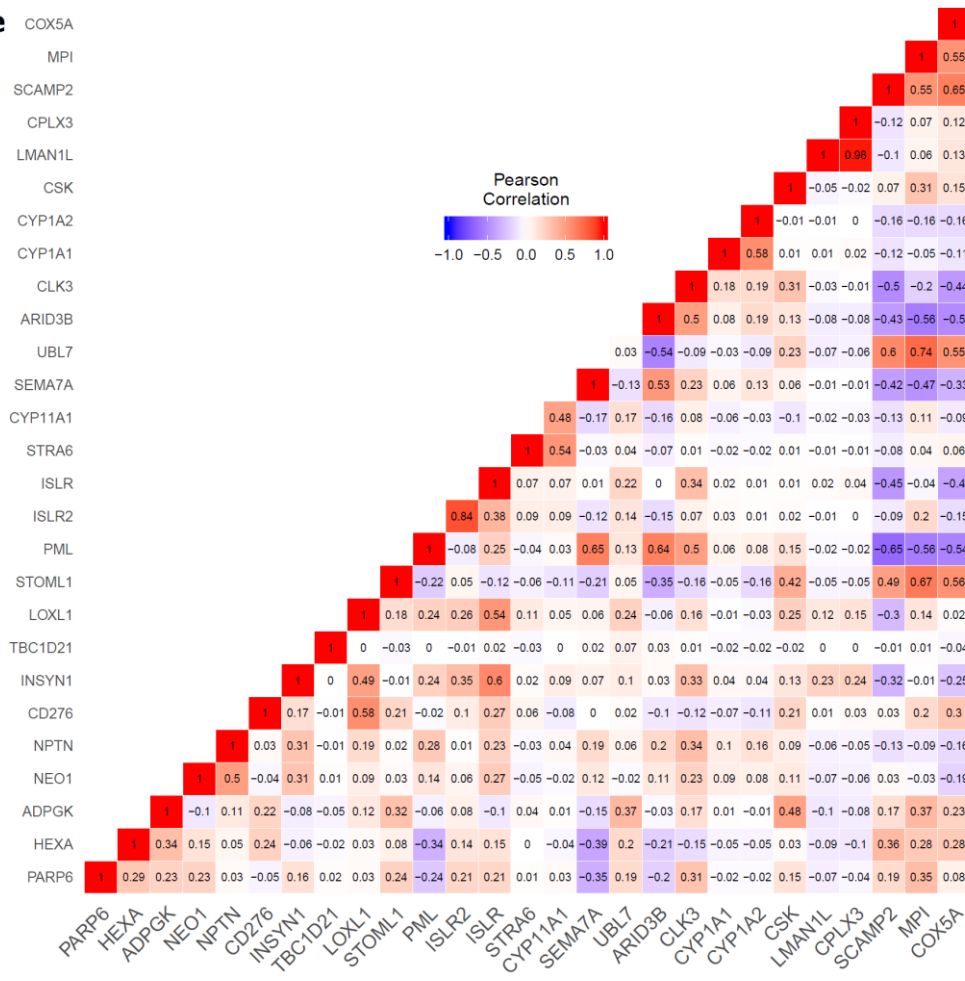

**Figure 2f**

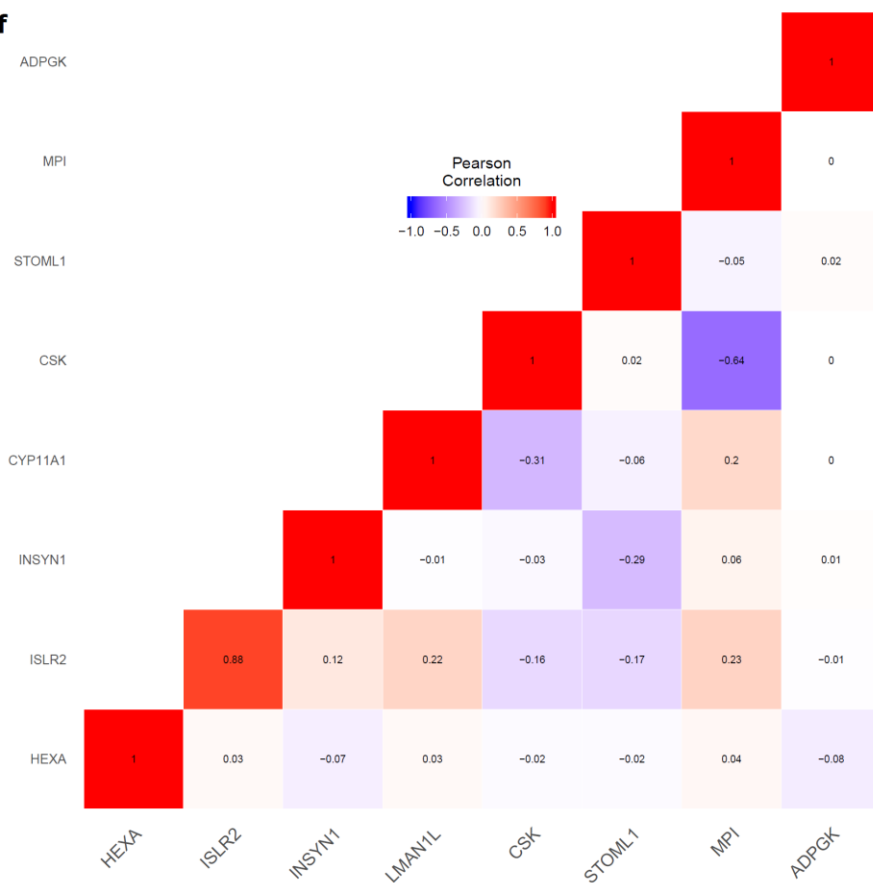

1  
2  
3  
4  
5  
6

# Figure 2g

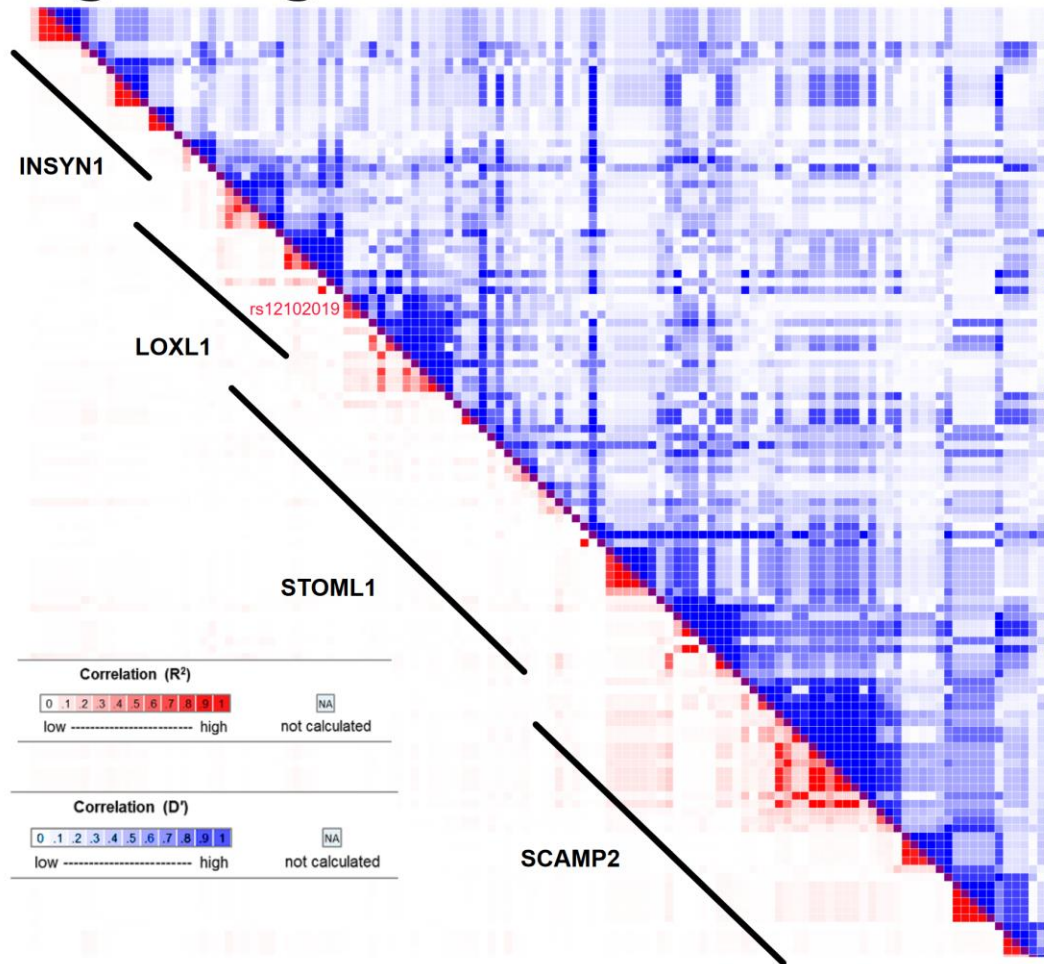

1

1 Overall, conditional PrediXcan analysis of genetic signals in the chromosome 15 region  
2 in the European dataset in a limited number of tissues was mostly consistent with PrediXcan  
3 analysis using the reduced models above. The analysis confirms the associations for *LOXLI*,  
4 *ARID3B*, *CPLX3*, *CYP1A1*, *CYP1A2*, *INSYNI*, *NEO1*, *PML*, *SCAMP2*, and *UBL7*, all of which,  
5 except for *INSYNI*, have been shown to be highly expressed in eye tissues<sup>48</sup> (**Suppl. Figure S5**).  
6 However, *INSYNI* has enhanced expression in brain tissues.<sup>49,50</sup> Collectively, these results  
7 suggest that some of the identified gene-level association signals between XFS and genetically  
8 imputed expression were driven by correlation to the strong *LOXLI* and its “proxy” *STOML1*  
9 signal.

10

#### 11 *Enrichment and pathway analysis*

12 Genes at genome-wide significance ( $p < 2.02e-7$ ) and nominal significance ( $p < 0.05$ ) were  
13 evaluated for enrichment of known pathways, using Enrichr.<sup>36,37</sup> Genes at genome-wide  
14 significance were enriched for genes reported for, or mapped to, GWAS variants implicated in  
15 several caffeine-related (coffee and caffeine consumption, and caffeine metabolism<sup>51-53</sup>) and  
16 blood pressure<sup>54</sup> traits. The enrichment for coffee consumption is replicated for the larger gene  
17 set that is associated with XFS at nominal significance.<sup>55</sup> Some of these genes, *CYP1A1* and  
18 *CYP1A2*,<sup>56</sup> are involved in fatty acid oxidation and estrogen receptor pathways. In addition, these  
19 two genes are also observed in the Reactome enrichment of protectin synthesis (**Table 2, Suppl.**  
20 **Table S9**).

21

22

23

1 **Table 2: Enrichment analysis of genes associated with XFS**

2

| Tool     | Database                     | enrichment | Name                                      | #found <sup>1</sup> | #total <sup>2</sup> | Adj-p-values/FDR <sup>a</sup> |
|----------|------------------------------|------------|-------------------------------------------|---------------------|---------------------|-------------------------------|
| Reactome | reactome                     | pathway    | Endosomal/Vacuolar pathway                | 59                  | 82                  | 1.83E-07                      |
| GSEA     | reactome                     | pathway    | Crosslinking of collagen fibrils          | 5                   | 8                   | 0.031                         |
|          | Wikipathway                  | pathways   | Aryl Hydrocarbon Receptor Pathway         | 6                   | 12                  | 0.013                         |
|          |                              |            | Aryl Hydrocarbon Receptor                 | 6                   | 13                  | 0.017                         |
|          |                              |            | Oxidation by Cytochrome P450              | 3                   | 15                  | 0.018                         |
|          |                              |            | Fatty Acid Omega Oxidation                | 5                   | 7                   | 0.047                         |
|          | DrugBank                     | Drugs      | Clomiphene                                | 3                   | 5                   | 0.006                         |
|          |                              |            | Ketoconazole                              | 3                   | 7                   | 0.006                         |
|          |                              |            | Quinidine                                 | 2                   | 9                   | 0.007                         |
|          |                              |            | Acetaminophen                             | 2                   | 7                   | 0.007                         |
|          |                              |            | Estradiol                                 | 2                   | 5                   | 0.007                         |
|          |                              |            | Estradiol acetate                         | 2                   | 5                   | 0.007                         |
|          |                              |            | Estradiol benzoate                        | 2                   | 5                   | 0.007                         |
|          |                              |            | Estradiol cypionate                       | 2                   | 5                   | 0.007                         |
|          |                              |            | Estradiol dianthate                       | 2                   | 5                   | 0.007                         |
|          |                              |            | Estradiol valerate                        | 2                   | 5                   | 0.007                         |
| Enrichr  | Jensen Diseases <sup>b</sup> | Disease    | Rheumatoid_arthritis                      | 119                 | 310                 | 8.32E-08                      |
|          |                              |            | Type_1_diabetes_mellitus                  | 68                  | 158                 | 2.69E-06                      |
|          |                              |            | Carcinoma                                 | 2619                | 11318               | 0.013                         |
|          |                              |            | Vitiligo                                  | 28                  | 63                  | 0.029                         |
| Enrichr  | GWAS Catalog <sup>c</sup>    | traits     | Caffeine consumption                      | 11                  | 14                  | 0.019                         |
| Enrichr  | DSigDB <sup>d</sup>          | Drugs      | Cyclosporin A_CTD_00007121                | 1258                | 4826                | 9.66E-11                      |
|          |                              |            | Valproic acid_CTD_00006977                | 2041                | 8313                | 1.75E-09                      |
|          |                              |            | Copper sulfate_CTD_00007279               | 1508                | 6017                | 3.04E-08                      |
|          |                              |            | Quercetin_CTD_00006679                    | 812                 | 3159                | 7.82E-05                      |
|          |                              |            | acetaminophen_CTD_00005295                | 1017                | 4136                | 0.007                         |
|          |                              |            | Aflatoxin B1_CTD_00007128                 | 773                 | 3082                | 0.006                         |
|          |                              |            | (-)-Epigallocatechin gallate_CTD_00002033 | 546                 | 2115                | 0.005                         |
|          |                              |            | Potassium chromate_CTD_00001284           | 491                 | 1898                | 0.011                         |
|          |                              |            | Methamphetamine_CTD_00006286              | 40                  | 102                 | 0.030                         |
|          |                              |            | Methyl Methanesulfonate_CTD_00006307      | 940                 | 3865                | 0.047                         |

3

4 <sup>1</sup>number of genes that are associated with XFS that belong gene set under test

5 <sup>2</sup>total number of genes in gene set being tested

6 <sup>a</sup>FDR fro Reactome and GSEA analysis, Adj-p.values for Enrichr

7 <sup>b</sup>Jensen Diseases – enrichment for genes associated with diseases in gene-diseases association mined from literature  
8 (<https://diseases.jensenlab.org/>).

9 <sup>c</sup>GWAS catalog – enrichment for genes reported for GWAS variants in variant-traits association  
10 (<https://www.ebi.ac.uk/gwas/>)

11 <sup>d</sup>DSigDB – enrichment for genes that are targets for a compound/drug (<http://tanlab.ucdenver.edu/DSigDB>)

12

1 Our gene set is also enriched for genes associated with carcinoma and three inflammatory  
2 conditions: rheumatoid arthritis, Type 1 diabetes, vitiligo in Jensen Diseases, a database that  
3 integrates evidence on disease-gene associations from automatic text mining, manually curated  
4 literature, cancer mutation data, and GWAS (<https://diseases.jensenlab.org/>).

5 We further analyzed our gene list against compounds in Drug Signatures Database  
6 (DSigDB, <http://tanlab.ucdenver.edu/DSigDB>), a gene set resource that relates drugs/compounds  
7 and their target genes. Our gene set is enriched for genes that are targets of cyclosporin A  
8 ( $p=9.66E-11$ ), and genes that are targets for compounds that are either 1) carcinogenic: Aflatoxin  
9 B1, potassium chromate, methyl methanesulfonate and copper sulfate, 2) neuroactive: valproic  
10 acid and methamphetamine, 3) neuroprotective: quercetin and epigallocatechin gallate, or 4)  
11 analgesic: acetaminophen (**Table 2, Suppl. Table S9**). Cyclosporin A is an immunosuppressant  
12 taken to treat rheumatoid arthritis and other autoimmune conditions, while quercetin and  
13 acetaminophen have been shown to have anti-inflammatory effects.<sup>57,58</sup>

14 Analysis in Gene Set Enrichment Analysis (GSEA) using a ranked association gene list  
15 based on effect sizes confirmed some of the enrichment observations using Enrichr. GSEA  
16 besides replicating enrichment for acetaminophen, showed enrichment for: 1) six synthetic  
17 estrogens, 2) estrogen regulators (Clomifene), 3) antiarrhythmic (quinidine), and 4) an anti-  
18 fungal (ketoconazole) (**Table 2, Suppl. Table S9**). The gene set was also enriched for genes that  
19 were associated with the collagen fibril crosslinking (FDR=0.0313) Reactome pathway.  
20 Analysis of the gene list in relation to the latest Reactome library (<https://reactome.org/>) returned  
21 significant enrichment for the endosomal-vacuolar pathway ( $p=8.14E-11$ ), an enrichment that  
22 was replicated in gene sets that were predicted to be downregulated ( $p=3.24E-8$ ). Our results

1 broadly recapitulated results above, even after excluding genes in HLA and chr17 inversion  
2 regions from the enrichment analysis of the gene set ( $p < 0.05$ ) (**Table 2, Suppl. Table S9**)

3

#### 4 *Quantitative Expression Validation Analysis*

5 Expression levels of *ARID3B*, *CD276*, *INSYNI*, *LOXLI*, *NEO1*, *SCAMP2*, *STOMLI* and  
6 *UBL7* were measured in XFS and control eye tissues. All transcript levels were found to be  
7 decreased in iris tissues obtained from XFS patients compared to control samples, with  
8 significant differences for *ARID3B*, *CD276*, *LOXLI*, *NEO1*, *SCAMP2* and *UBL7* ( $p < 0.05$ )  
9 (**Figure 3**). *INSYNI* and *STOMLI* were not significantly downregulated in diseased eyes relative  
10 to normal eyes in validation analysis. *STOMLI* is the closest gene to and potentially proxy for  
11 *LOXLI* among those that show association in our PrediXcan results within the chr15q22-25  
12 region. We included it as a negative control in the validation analysis, while *LOXLI* was a  
13 positive control considering that it had already been shown to exhibit pattern of downregulation  
14 in gene expression in diseased relative to normal tissues.<sup>13</sup> *CD276* was selected for functional  
15 validation in eye tissue despite no significant association with XFS in single-tissue analysis in  
16 the European ancestry data because it was significantly associated with XFS in multi-tissue  
17 analysis in European data. In addition, it was one of the gene association signals which were not  
18 affected by excluding variants that were in LD with *LOXLI/STOMLI* model SNPs in the multi-  
19 ethnic global dataset. Overall, our validation results replicate the associations found using the  
20 genetically determined gene expression.

21

22

23

24



1 **Figure 3:** Expression of *NEO1*, *CD276*, *INSYN1*, *LOXL1*, *STOML1*, *UBL7*, *ARID3B* and *SCAMP2*  
2 mRNA in iris tissues derived from normal human donors (control) (n=19) and donors with XFS syndrome  
3 (n=12) using real-time PCR technology. Expression levels were reduced in XFS specimens compared to  
4 control specimens, with significant differences for *NEO1*, *CD276*, *LOXL1*, *UBL7*, *ARID3B* and *SCAMP2*.  
5 The relative expression levels were normalized relative to GAPDH and are represented as mean values  $\pm$   
6 SD (\* $p$ <0.05; \*\* $p$ <0.01, \*\*\* $p$ <0.001).  
7

**Figure 3**

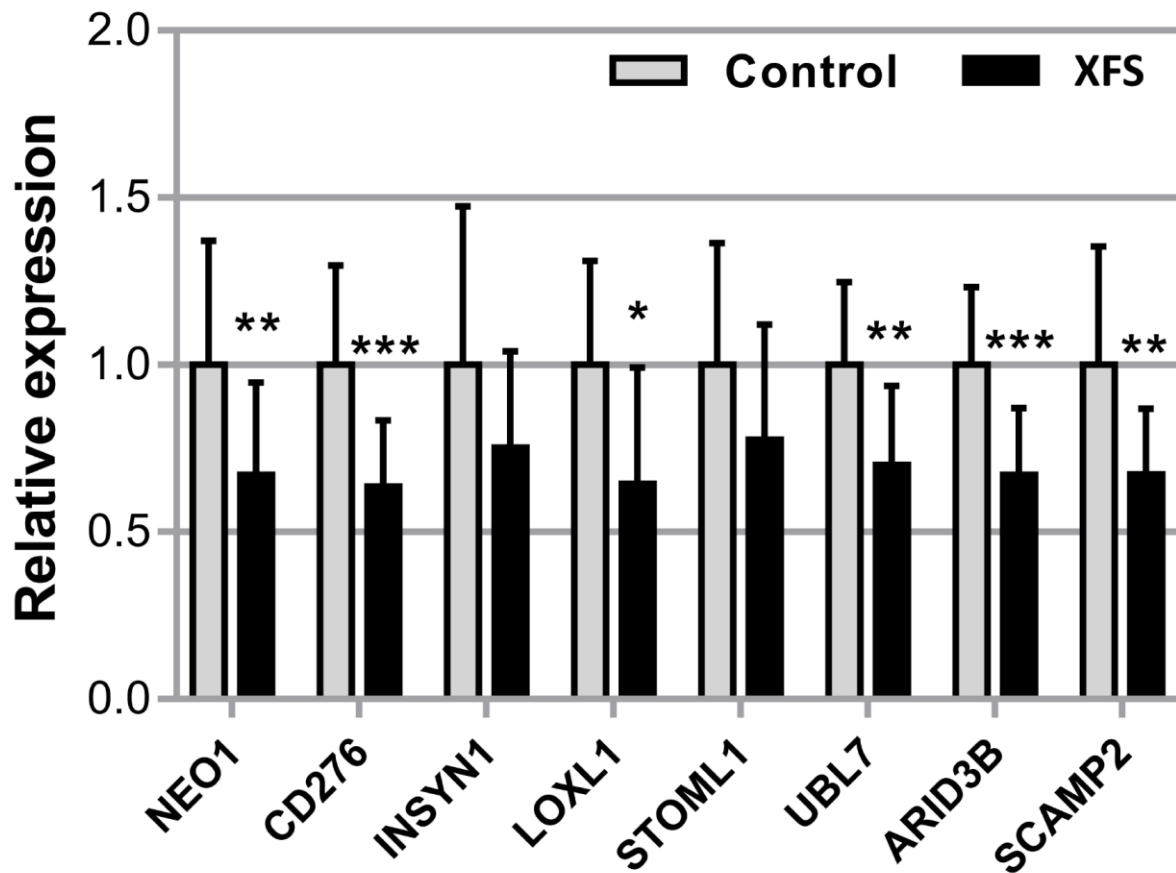

8

9

1 *Comorbidity/pleiotropy analysis*

2           To gain further biological insights into the gene associations we observed in our  
3 PrediXcan analysis, we performed logistic regression analysis of both XFS ICD9/10 diagnosis  
4 and Polygenic Risk Score generated from the multi-ethnic summary data across the BioVU  
5 individuals, Vanderbilt University's electronic health records database linked to genetic  
6 information, as the target dataset (**Materials and Methods**). XFS diagnosis was associated with  
7 an increased risk of 96 phenotypes in BioVU, including 12 musculoskeletal phenotypes, 4  
8 infectious diseases, and 1 cardiovascular phenotype. These results are consistent with higher  
9 comorbidity of diseases affecting inflammation, connective tissue, and the circulatory system in  
10 individuals with XFS (**Suppl. Table S10a, Suppl. Figure S6a**).

11           XFS polygenic score was not significantly associated with any phenotypes in the analysis  
12 (**Suppl. Figure S6b**). This potentially indicated that PRS generated from the global multi-ethnic  
13 GWAS summary might not be powered to detect association with traits in the EHR, and we  
14 might require scores from a more homogeneous and a much larger sample size. However, among  
15 the top PRS associations, we found several inflammatory diseases (**Suppl. Table S10b**),  
16 consistent with the enrichment results reported above.

17

## 1 Discussion

2  
3 We performed gene-based association analysis using GWAS summary statistics and  
4 conducted extensive experimental validation of genes associated with XFS. From our PrediXcan  
5 analysis, we identified 35 associated genes with XFS, 23 in single-tissue analysis and the rest in  
6 multi-tissue analysis. To eliminate the possibility of false-positive results due to LD  
7 contamination, we performed extensive additional analyses. First, we performed PrediXcan  
8 analysis in reduced models removing variants in LD with the two *LOXLI* missense variants  
9 associated with XFS, and variants in *LOXLI/STOMLI* models in both global multiethnic and a  
10 subset of European ancestry individuals. Secondly, we conducted conditional analysis of the  
11 significant signals in European ancestry individuals. Thirdly, we then filtered signals based on  
12 correlated gene expression, LD and shared eQTLs and confirmed thirteen genes to be associated  
13 with XFS. Finally, expression analysis in human iris tissues further confirmed six of these seven  
14 signals, which were significantly downregulated in diseased XFS relative to normal eye tissues;  
15 *ARID3B*, *CD276*, *LOXLI*, *NEO1*, *SCAMP2* and *UBL7*.

16 Our results suggest potentially substantial roles of inflammation and environment in the  
17 etiology of XFS. All of the six genes prioritized here by prediction and extensive validation  
18 analyses have inflammatory roles. *ARID3B*, *CD276*, *LOXLI* and *NEO1* are immunoregulatory  
19 molecules involved in the interaction between different tumors and the immune system.<sup>59-62</sup>  
20 *SCAMP2* is important in granule exocytosis, a process crucial in membrane fusion in normal  
21 cellular functions in diverse systems including the immune system's inflammatory response.<sup>63-65</sup>  
22 *CD276* is involved in regulation of Ag-specific T cell-mediated immune responses and  
23 participates in the innate immunity-associated inflammatory response.<sup>66,67</sup> *LOXLI* has also been  
24 implicated in fibrosis in response to inflammation in human breast cancer,<sup>68</sup> in liver and lungs in

1 model animals.<sup>69–71</sup> *UBL7* encodes a member of the ubiquitin protein family, that is crucial in  
2 immune response and regulation of inflammatory response.<sup>72–74</sup>

3 Genes that show significant association of predicted expression with XFS at nominal  
4 significance are enriched for genes associated with three inflammatory conditions: rheumatoid  
5 arthritis, Type 1 diabetes and vitiligo in the Jensen Diseases database, with genes associated with  
6 the former two conditions enriched even with HLA region excluded. This is also consistent with  
7 the enrichment we find in DSigDB and DrugBank for cyclosporin A, acetaminophen and  
8 quercetin, which are compounds that have anti-inflammatory effects.<sup>75</sup>

9 Enrichment of predicted genes in this study in the polyunsaturated fatty acid (PUFA) and  
10 steroid derivatives: protectin (Reactome), omega fatty acid and estrogen (WikiPathways) are also  
11 consistent with the potential role of inflammation in XFS. Protectin, a derivative of PUFA  
12 including Omega-3 that are major components of fish oil, has an anti-inflammatory, anti-  
13 amyloidogenic, and anti-apoptotic activities in human neural cells.<sup>76–78</sup> Omega fatty acid has  
14 been suggested as an IOP reducing supplements<sup>79–81</sup> because of its anti-inflammatory effects.<sup>82</sup>  
15 Association of steroid derivative, estrogen with glaucoma has been previously explored with  
16 higher levels of estrogen in reduction in IOP and conferring a possible reduced risk of  
17 glaucoma.<sup>83</sup> The synthetic form of estrogen, estradiol, has been shown in a rat glaucoma model  
18 to inhibit optic nerve axonal degeneration by inducing a protein that is crucial in protecting RGC  
19 from oxidative damage.<sup>84,85</sup>

20 The association with inflammation is consistent with studies in limited numbers of XFS  
21 patients that found elevated inflammatory markers relative to controls, including cytokines, and  
22 markers such as interleukin-6 (*IL-6*) and *IL-8*,<sup>86,87</sup> tumor necrosis factor- $\alpha$  (*TNF- $\alpha$* ) and *YKL-*  
23 *40*.<sup>88,89</sup> However, there are conflicting results for high sensitivity C-reactive protein.<sup>90,91</sup>

1           In addition, the XFS gene sets are enriched for genes that map to variants implicated in  
2 coffee and caffeine intake. Effects of caffeine consumption in the etiology of XFS have been  
3 studied, on the premise that coffee consumption increases plasma homocysteine levels that are  
4 speculated to enhance XFS material formation by contributing to vascular damage, oxidative  
5 stress, and extracellular matrix alterations.<sup>92-95</sup> Consumption of coffee has been reported to have  
6 both pro- and anti-inflammatory effects.<sup>96</sup> However, review of fifteen studies on the effect of  
7 coffee and caffeine on inflammation inferred the former had anti-inflammatory action, while the  
8 latter had complex effects on the inflammatory response with both proinflammatory and anti-  
9 inflammatory responses reported.<sup>97</sup> Caffeine might have a neuroprotective role by regulating  
10 pathways that produce inflammatory molecules via adenosine receptors in brain cells.<sup>98,99</sup>  
11 Posttranscriptional regulation of *LOXL1* gene expression has been also shown to be modulated  
12 by caffeine.<sup>100</sup>

13           Globally, our results of the six novel functionally validated genes also confirm the role of  
14 connective tissue involvement in the etiology of XFS. Aung, *et al.*,<sup>13</sup> demonstrated the role of  
15 haplotypes that carry *LOXL1* XFS causal coding variants in upregulating extracellular matrix  
16 components such as elastin and fibrillin, and increasing cell-cell adhesion. In addition, two of the  
17 novel genes in our study, *ARID3B* and *NEO1*, among the other six genes identified and validated  
18 in both studies, have adhesive roles in the body. *ARID3B* in conjunction with *FDZ5* protein  
19 increases adhesion to ECM components, collagen IV, fibronectin and vitronectin, that are  
20 components of exfoliation deposits.<sup>101,102</sup> *NEO1* has also been shown to play adhesive role  
21 during organogenesis.<sup>103</sup>

22           Results from our enrichment analysis of genes associated with XFS are also consistent  
23 with a role of dysregulation in connective tissue metabolism in the etiology of XFS.

1 Cylosporin\_A regulate *lysyl oxidase* expression and collagen metabolism probably by inhibiting  
2 an isomerase involved in protein folding.<sup>104–106</sup> Other anti-inflammatory compounds identified  
3 from our enrichment analysis in the current study, epigallocatechin gallate, valproic acid,  
4 quercetin, ketoconazole and acetaminophen have also been shown to suppress collagen and/or  
5 are anti-fibrotic in variety of tissues by yet to be elucidated mechanism.<sup>107–111</sup> Moreover, coffee  
6 and caffeine inhibit collagen expression and deposition, and have anti-fibrotic effects by  
7 blocking expressions and/or by modulating effects of profibrotic factors.<sup>112–115</sup>

8 Our results that show enrichment in crosslinking of collagen fibrils, a crucial constituent  
9 of connective tissues, and endosomal-vacuolar Reactome pathways, in our associated genes  
10 further confirm the importance of connective tissues in the etiology of XFS. In addition, there  
11 may be anomalies in an endosomal-vacuolar pathway shown to be involved in the accumulation  
12 of other aberrant proteins, including: A $\beta$  peptides,<sup>116</sup> prion<sup>117</sup>, and Huntingtin<sup>118</sup> in neurons, and  
13 implicated in neurodegeneration. Moreover, inflammation has also been suggested in migratory  
14 failure and subsequent deposition of aberrant proteinaceous materials in affected tissues in  
15 conjunction with other molecular actors.<sup>87,119–124</sup>

16 Finally, our comorbidity analysis in the BioVU EHR indicated XFS association with  
17 several chronic inflammatory dermatological, musculo-skeletal, respiratory and infectious  
18 conditions. Moreover, extracellular matrix dysregulation is also suggested by our PheWAS  
19 results indicating XFS comorbidity with Vitamin D deficiency. Vitamin D regulate collagen  
20 cross-linking in vitro by upregulating gene expression of specific lysyl hydrogenase and oxidase  
21 enzymes.<sup>125</sup>

22

23

1 *Limitations of the study*

2           This study has two main limitations. First, despite the fact that GTEx data for the 48  
3 tissues represent the most comprehensive eQTL data set of human tissues, it does not constitute a  
4 complete representation of all human tissues and may fail to identify the real causal genes in the  
5 unsampled ocular tissue. However, we have confirmed from an ocular tissue database that novel  
6 signals identified in this study are robustly expressed in XFS relevant eye tissues. Moreover,  
7 recent analysis shows that the majority of the human body tissues exhibit higher degrees of tissue  
8 similarities.<sup>126</sup> In addition, it has been shown that most complex conditions, including XFS,  
9 might actually manifest in many diverse tissues in the body.<sup>126</sup>

10           Second, only a third of the signals identified in the larger data were robustly confirmed in  
11 a European dataset at genome-wide significance. This raised the possibility that most of the  
12 initial signals identified an artefact of local LD leakage or shared eQTLs with the sentinel  
13 *LOXLI/STOML1* signal. Using statistical validation with reduced models including no SNPs in  
14 LD with sentinel variants, we confirmed associations independent of *LOXLI* for at least ten  
15 genes including seven that were experimentally validated. In addition, results from a recent study  
16 are consistent with two other association gene signals confirmed using multi-tissue analysis of  
17 European dataset and PrediXcan of reduced models in multi-ethnic global data, *ISLR2* and  
18 *STRA6*.<sup>25</sup> *ISLR2* and *STRA6* are both significantly downregulated in tissues of XFS patients  
19 together with other key components of the *STRA6* receptor-driven Retinoic acid (RA) signaling  
20 pathway, and that siRNA-mediated downregulation of RA signaling induces upregulation of  
21 *LOXLI* and XFS-associated matrix genes in XFS-relevant cell types.<sup>25</sup> These data indicate that  
22 dysregulation of *STRA6* and impaired retinoid metabolism are involved in the pathophysiology  
23 of XFS syndrome. Retinoic acid, the active metabolite involved in the signaling pathway

1 implicated by Berner *et al*<sup>25</sup> in XFS through regulation of *ISLR2*, *STRA6* and *LOXLI*, has been  
2 shown to control critical checkpoints in inflammation and to promote an inflammatory  
3 environment.<sup>127–129</sup>

4           In summary, our analysis of predicted gene expression and extensive functional analysis  
5 in eye tissue prioritized six genes in association with XFS. Our results further confirmed the role  
6 of connective tissues and highlighted the importance of inflammation in the etiology of XFS.  
7 Thus, molecular elements that underlie the interaction of connective tissue biosynthesis and  
8 inflammatory pathways may play a central role in the etiology of XFS.



1 **DISCLOSURES:**

2 ERG receives an honorarium from the journal *Circulation Research* of the American Heart  
3 Association, as a member of the Editorial Board.

4 The remaining authors declare no competing interests.

5 **ACKNOWLEDGMENTS:**

6 We are grateful to Maria Niarchou and Tyne Fleming for comments on earlier version of the  
7 manuscript.

8 JH was jointly supported through grant to MAB (T32 grant 5T32EY021453), ERG and NJC.

9 ERG is grateful to the President and Fellows of Clare Hall, University of Cambridge for the  
10 fellowship support. ERG is also supported by a NIH Genomic Innovator Award  
11 (R35HG010718). The content is solely the responsibility of the authors and does not necessarily  
12 represent the official views of the National Institutes of Health.

13

14 KMJ - Joseph Ellis Family and William Black Research Funds, NEI Core Grant 6P30EY08126  
15 to Vanderbilt Vision Research Center, Unrestricted Departmental Grant from Research to  
16 Prevent Blindness, Inc., NY.

17 The European-Data-Set was support by the Interdisciplinary Center for Clinical Research (IZKF)  
18 at the University Hospital of the University of Erlangen-Nuremberg (project E23) to AR and  
19 USS and the Deutsche Forschungsgemeinschaft (SCHL 366/8-1) to USS.

20

21 JH, NJC and ERG jointly conceived the project. AR, US and FP managed patients' data and  
22 tissues' samples of the three European cohorts. US, DB and FP conducted functional biological  
23 experiments. FP contributed raw genotyping data for European populations. JH performed all the  
24 statistical analysis. JH drafted the manuscript with critical input from KJ, NJC, ERG, FP & CCK.  
25 The manuscript was approved by all authors. NJC was responsible for obtaining financial  
26 support for this study.

## 1 References

- 2 1. Schlötzer-Schrehardt, U. (2011). Genetics and genomics of pseudoexfoliation syndrome/glaucoma.  
3 Middle East Afr. J. Ophthalmol. *18*, 30–36.
- 4 2. Schlötzer-Schrehardt, U., and Naumann, G.O.H. (2006). Ocular and Systemic Pseudoexfoliation  
5 Syndrome. *Am. J. Ophthalmol.* *141*, 921-937.e2.
- 6 3. Rebecca, M., Gayathri, R., Bhuvanandar, R., Sripriya, K., Shantha, B., and Angayarkanni, N. (2018).  
7 Elastin modulation and modification by homocysteine: a key factor in the pathogenesis of  
8 Pseudoexfoliation syndrome? *Br. J. Ophthalmol.* *bjophthalmol-2018-312088*.
- 9 4. Vesti, E., and Kivelä, T. (2000). Exfoliation syndrome and exfoliation glaucoma. *Prog. Retin. Eye Res.*  
10 *19*, 345–368.
- 11 5. Chung, H., Arora, S., Damji, K.F., and Weis, E. (2018). Association of pseudoexfoliation syndrome with  
12 cardiovascular and cerebrovascular disease: a systematic review and meta-analysis. *Can. J. Ophthalmol.*  
13 *53*, 365–372.
- 14 6. Andrikopoulos, G.K., Alexopoulos, D.K., and Gartaganis, S.P. (2014). Pseudoexfoliation syndrome and  
15 cardiovascular diseases. *World J. Cardiol.* *6*, 847–854.
- 16 7. Pasutto, F., Zenkel, M., Hoja, U., Berner, D., Uebe, S., Ferrazzi, F., Schödel, J., Liravi, P., Ozaki, M., Paoli,  
17 D., et al. (2017). Pseudoexfoliation syndrome-associated genetic variants affect transcription factor  
18 binding and alternative splicing of LOXL1. *Nat. Commun.* *8*, 15466.
- 19 8. Xu, F., Zhang, L., and Li, M. (2012). Plasma homocysteine, serum folic acid, serum vitamin B12, serum  
20 vitamin B6, MTHFR and risk of pseudoexfoliation glaucoma: a meta-analysis. *Graefes Arch. Clin. Exp.*  
21 *Ophthalmol.* *250*, 1067–1074.
- 22 9. Clement, C.I., Goldberg, I., Healey, P.R., and Graham, S.L. (2009). Plasma Homocysteine, MTHFR Gene  
23 Mutation, and Open-angle Glaucoma. *J. Glaucoma* *18*,.
- 24 10. AASVED, H. (1975). STUDY OF RELATIVES OF PERSONS WITH FIBRILLOPATHIA EPITHELIOCAPSULARIS  
25 (PSEUDOEXFOLIATION OF THE LENS CAPSULE). *Acta Ophthalmol. (Copenh.)* *53*, 879–886.
- 26 11. Gottfredsdottir, M.S., Sverrisson, T., Musch, D.C., and Stefansson, E. (1999). Chronic Open-Angle  
27 Glaucoma and Associated Ophthalmic Findings in Monozygotic Twins and Their Spouses in Iceland. *J.*  
28 *Glaucoma* *8*,.
- 29 12. Aung, T., Ozaki, M., Mizoguchi, T., Allingham, R.R., Li, Z., Haripriya, A., Nakano, S., Uebe, S., Harder,  
30 J.M., Chan, A.S.Y., et al. (2015). A common variant mapping to CACNA1A is associated with susceptibility  
31 to exfoliation syndrome. *Nat. Genet.* *47*, 387–392.
- 32 13. Aung, T., Ozaki, M., Lee, M.C., Schlötzer-Schrehardt, U., Thorleifsson, G., Mizoguchi, T., Igo Jr, R.P.,  
33 Haripriya, A., Williams, S.E., Astakhov, Y.S., et al. (2017). Genetic association study of exfoliation  
34 syndrome identifies a protective rare variant at LOXL1 and five new susceptibility loci. *Nat. Genet.* *49*,  
35 993.

- 1 14. Thorleifsson, G., Magnusson, K.P., Sulem, P., Walters, G.B., Gudbjartsson, D.F., Stefansson, H.,  
2 Jonsson, T., Jonasdottir, A., Jonasdottir, A., Stefansdottir, G., et al. (2007). Common Sequence Variants in  
3 the *LOXL1* Gene Confer Susceptibility to Exfoliation Glaucoma. *Science* 317, 1397.
- 4 15. Krumbiegel, M., Pasutto, F., Schlötzer-Schrehardt, U., Uebe, S., Zenkel, M., Mardin, C.Y., Weisschuh,  
5 N., Paoli, D., Gramer, E., Becker, C., et al. (2011). Genome-wide association study with DNA pooling  
6 identifies variants at CNTNAP2 associated with pseudoexfoliation syndrome. *Eur. J. Hum. Genet. EJHG*  
7 19, 186–193.
- 8 16. Nakano, M., Ikeda, Y., Tokuda, Y., Fuwa, M., Ueno, M., Imai, K., Sato, R., Omi, N., Adachi, H.,  
9 Kageyama, M., et al. (2014). Novel common variants and susceptible haplotype for exfoliation glaucoma  
10 specific to Asian population. *Sci. Rep.* 4, 5340.
- 11 17. Zagajewska, K., Piątkowska, M., Goryca, K., Bałabas, A., Kluska, A., Paziewska, A., Pośpiech, E.,  
12 Grabska-Liberek, I., and Hennig, E.E. (2018). GWAS links variants in neuronal development and actin  
13 remodeling related loci with pseudoexfoliation syndrome without glaucoma. *Exp. Eye Res.* 168, 138–  
14 148.
- 15 18. Craig, J.E., Hewitt, A.W., McMellon, A.E., Henders, A.K., Ma, L., Wallace, L., Sharma, S., Burdon, K.P.,  
16 Visscher, P.M., Montgomery, G.W., et al. (2009). Rapid inexpensive genome-wide association using  
17 pooled whole blood. *Genome Res.* 19, 2075–2080.
- 18 19. Mori, K., Imai, K., Matsuda, A., Ikeda, Y., Naruse, S., Hitora-Takeshita, H., Nakano, M., Taniguchi, T.,  
19 Omi, N., Tashiro, K., et al. (2008). *LOXL1* genetic polymorphisms are associated with exfoliation  
20 glaucoma in the Japanese population. *Mol. Vis.* 14, 1037–1040.
- 21 20. Thorleifsson, G., Walters, G.B., Hewitt, A.W., Masson, G., Helgason, A., DeWan, A., Sigurdsson, A.,  
22 Jonasdottir, A., Gudjonsson, S.A., Magnusson, K.P., et al. (2010). Common variants near *CAV1* and *CAV2*  
23 are associated with primary open-angle glaucoma. *Nat. Genet.* 42, 906–909.
- 24 21. Chen, L., Jia, L., Wang, N., Tang, G., Zhang, C., Fan, S., Liu, W., Meng, H., Zeng, W., Liu, N., et al.  
25 (2009). Evaluation of *LOXL1* polymorphisms in exfoliation syndrome in a Chinese population. *Mol. Vis.*  
26 15, 2349–2357.
- 27 22. Williams, S.E.I., Whigham, B.T., Liu, Y., Carmichael, T.R., Qin, X., Schmidt, S., Ramsay, M., Hauser,  
28 M.A., and Allingham, R.R. (2010). Major *LOXL1* risk allele is reversed in exfoliation glaucoma in a black  
29 South African population. *Mol. Vis.* 16, 705–712.
- 30 23. Sharma, S., Martin, S., Sykes, M.J., Dave, A., Hewitt, A.W., Burdon, K.P., Ronci, M., Voelcker, N.H.,  
31 and Craig, J.E. (2016). Biological effect of *LOXL1* coding variants associated with pseudoexfoliation  
32 syndrome. *Exp. Eye Res.* 146, 212–223.
- 33 24. Kim, S., and Kim, Y. (2012). Variations in *LOXL1* associated with exfoliation glaucoma do not affect  
34 amine oxidase activity. *Mol. Vis.* 18, 265–270.
- 35 25. Berner, D., Hoja, U., Zenkel, M., Ross, J.J., Uebe, S., Paoli, D., Frezzotti, P., Rautenbach, R.M., Ziskind,  
36 A., Williams, S.E., et al. (2019). The protective variant rs7173049 at *LOXL1* locus impacts on retinoic acid  
37 signaling pathway in pseudoexfoliation syndrome. *Hum. Mol. Genet.*

- 1 26. Hauser, M.A., Aboobakar, I.F., Liu, Y., Miura, S., Whigham, B.T., Challa, P., Wheeler, J., Williams, A.,  
2 Santiago-Turla, C., Qin, X., et al. (2015). Genetic variants and cellular stressors associated with  
3 exfoliation syndrome modulate promoter activity of a lncRNA within the LOXL1 locus. *Hum. Mol. Genet.*  
4 *24*, 6552–6563.
- 5 27. Gamazon, E.R., Wheeler, H.E., Shah, K.P., Mozaffari, S.V., Aquino-Michaels, K., Carroll, R.J., Eyler,  
6 A.E., Denny, J.C., GTEx Consortium, Nicolae, D.L., et al. (2015). A gene-based association method for  
7 mapping traits using reference transcriptome data. *Nat Genet* *47*, 1091–1098.
- 8 28. Barbeira, A.N., Dickinson, S.P., Bonazzola, R., Zheng, J., Wheeler, H.E., Torres, J.M., Torstenson, E.S.,  
9 Shah, K.P., Garcia, T., Edwards, T.L., et al. (2018). Exploring the phenotypic consequences of tissue  
10 specific gene expression variation inferred from GWAS summary statistics. *Nat. Commun.* *9*, 1825–1825.
- 11 29. Gamazon, E.R., Segrè, A.V., van de Bunt, M., Wen, X., Xi, H.S., Hormozdiari, F., Ongen, H.,  
12 Konkashbaev, A., Derks, E.M., Aguet, F., et al. (2018). Using an atlas of gene regulation across 44 human  
13 tissues to inform complex disease- and trait-associated variation. *Nat. Genet.* *50*, 956–967.
- 14 30. Barbeira, A.N., Pividori, M., Zheng, J., Wheeler, H.E., Nicolae, D.L., and Im, H.K. (2019). Integrating  
15 predicted transcriptome from multiple tissues improves association detection. *PLOS Genet.* *15*,  
16 e1007889.
- 17 31. Aguet, F., Brown, A.A., Castel, S.E., Davis, J.R., Mohammadi, P., Segrè, A.V., Zappala, Z., Abell, N.S.,  
18 Frésard, L., Gamazon, E.R., et al. (2016). Local genetic effects on gene expression across 44 human  
19 tissues. *BioRxiv* 074450.
- 20 32. Wainberg, M., Sinnott-Armstrong, N., Mancuso, N., Barbeira, A.N., Knowles, D., Golan, D., Ermel, R.,  
21 Ruusalepp, A., Quertermous, T., Hao, K., et al. (2018). Transcriptome-wide association studies:  
22 opportunities and challenges. *BioRxiv* 206961.
- 23 33. Machiela, M.J., and Chanock, S.J. (2015). LDlink: a web-based application for exploring population-  
24 specific haplotype structure and linking correlated alleles of possible functional variants. *Bioinformatics*  
25 *31*, 3555–3557.
- 26 34. Machiela, M.J., and Chanock, S.J. (2017). LDassoc: an online tool for interactively exploring genome-  
27 wide association study results and prioritizing variants for functional investigation. *Bioinformatics* *34*,  
28 887–889.
- 29 35. Lin, D.-Y., Tao, R., Kalsbeek, W.D., Zeng, D., Gonzalez, F., II, Fernández-Rhodes, L., Graff, M., Koch,  
30 G.G., North, K.E., and Heiss, G. Genetic Association Analysis under Complex Survey Sampling: The  
31 Hispanic Community Health Study/Study of Latinos. *Am. J. Hum. Genet.* *95*, 675–688.
- 32 36. Chen, E.Y., Tan, C.M., Kou, Y., Duan, Q., Wang, Z., Meirelles, G.V., Clark, N.R., and Ma’ayan, A. (2013).  
33 Enrichr: interactive and collaborative HTML5 gene list enrichment analysis tool. *BMC Bioinformatics* *14*,  
34 128–128.
- 35 37. Kuleshov, M.V., Jones, M.R., Rouillard, A.D., Fernandez, N.F., Duan, Q., Wang, Z., Koplev, S., Jenkins,  
36 S.L., Jagodnik, K.M., Lachmann, A., et al. (2016). Enrichr: a comprehensive gene set enrichment analysis  
37 web server 2016 update. *Nucleic Acids Res.* *44*, W90–W97.

- 1 38. Liao, Y., Wang, J., Jaehnig, E.J., Shi, Z., and Zhang, B. (2019). WebGestalt 2019: gene set analysis  
2 toolkit with revamped UIs and APIs. *Nucleic Acids Res.* *47*, W199–W205.
- 3 39. Wang, J., Vasaikar, S., Shi, Z., Greer, M., and Zhang, B. (2017). WebGestalt 2017: a more  
4 comprehensive, powerful, flexible and interactive gene set enrichment analysis toolkit. *Nucleic Acids*  
5 *Res.* *45*, W130–W137.
- 6 40. Wang, J., Duncan, D., Shi, Z., and Zhang, B. (2013). WEB-based GENE SeT Analysis Toolkit  
7 (WebGestalt): update 2013. *Nucleic Acids Res.* *41*, W77–W83.
- 8 41. Zhang, B., Kirov, S., and Snoddy, J. (2005). WebGestalt: an integrated system for exploring gene sets  
9 in various biological contexts. *Nucleic Acids Res.* *33*, W741–W748.
- 10 42. Croft, D., Mundo, A.F., Haw, R., Milacic, M., Weiser, J., Wu, G., Caudy, M., Garapati, P., Gillespie, M.,  
11 Kamdar, M.R., et al. (2014). The Reactome pathway knowledgebase. *Nucleic Acids Res.* *42*, D472–D477.
- 12 43. Aguiar, V.R.C., César, J., Delaneau, O., Dermitzakis, E.T., and Meyer, D. (2019). Expression estimation  
13 and eQTL mapping for HLA genes with a personalized pipeline. *PLoS Genet.* *15*, e1008091–e1008091.
- 14 44. Said, I., Byrne, A., Serrano, V., Cardeno, C., Vollmers, C., and Corbett-Detig, R. (2018). Linked genetic  
15 variation and not genome structure causes widespread differential expression associated with  
16 chromosomal inversions. *Proc. Natl. Acad. Sci.* *115*, 5492.
- 17 45. Berner, D., Zenkel, M., Pasutto, F., Hoja, U., Liravi, P., Gusek-Schneider, G.C., Kruse, F.E., Schödel, J.,  
18 Reis, A., and Schlötzer-Schrehardt, U. (2017). Posttranscriptional Regulation of LOXL1 Expression Via  
19 Alternative Splicing and Nonsense-Mediated mRNA Decay as an Adaptive Stress Response  
20 Regulation by NMD-Coupled Alternative Splicing. *Invest. Ophthalmol. Vis. Sci.* *58*, 5930–5940.
- 21 46. Denny, J.C., Ritchie, M.D., Basford, M.A., Pulley, J.M., Bastarache, L., Brown-Gentry, K., Wang, D.,  
22 Masys, D.R., Roden, D.M., and Crawford, D.C. (2010). PheWAS: demonstrating the feasibility of a  
23 phenome-wide scan to discover gene–disease associations. *Bioinformatics* *26*, 1205–1210.
- 24 47. Aung, T., Ozaki, M., Lee, M.C., Schlötzer-Schrehardt, U., Thorleifsson, G., Mizoguchi, T., Igo Jr, R.P.,  
25 Haripriya, A., Williams, S.E., Astakhov, Y.S., et al. (2017). Genetic association study of exfoliation  
26 syndrome identifies a protective rare variant at LOXL1 and five new susceptibility loci. *Nat. Genet.* *49*,  
27 993.
- 28 48. Wagner, A.H., Anand, V.N., Wang, W.-H., Chatterton, J.E., Sun, D., Shepard, A.R., Jacobson, N., Pang,  
29 I.-H., Deluca, A.P., Casavant, T.L., et al. (2013). Exon-level expression profiling of ocular tissues. *Exp. Eye*  
30 *Res.* *111*, 105–111.
- 31 49. Thul, P.J., Åkesson, L., Wiking, M., Mahdessian, D., Geladaki, A., Ait Blal, H., Alm, T., Asplund, A.,  
32 Björk, L., Breckels, L.M., et al. (2017). A subcellular map of the human proteome. *Science* *356*, eaal3321.
- 33 50. Uhlén, M., Fagerberg, L., Hallström, B.M., Lindskog, C., Oksvold, P., Mardinoglu, A., Sivertsson, Å.,  
34 Kampf, C., Sjöstedt, E., Asplund, A., et al. (2015). Tissue-based map of the human proteome. *Science*  
35 *347*, 1260419.

- 1 51. Cornelis, M.C., Monda, K.L., Yu, K., Paynter, N., Azzato, E.M., Bennett, S.N., Berndt, S.I., Boerwinkle,  
2 E., Chanock, S., Chatterjee, N., et al. (2011). Genome-wide meta-analysis identifies regions on 7p21  
3 (AHR) and 15q24 (CYP1A2) as determinants of habitual caffeine consumption. *PLoS Genet.* 7, e1002033–  
4 e1002033.
- 5 52. Amin, N., Byrne, E., Johnson, J., Chenevix-Trench, G., Walter, S., Nolte, I.M., kConFab Investigators,  
6 Vink, J.M., Rawal, R., Mangino, M., et al. (2012). Genome-wide association analysis of coffee drinking  
7 suggests association with CYP1A1/CYP1A2 and NRCAM. *Mol. Psychiatry* 17, 1116–1129.
- 8 53. Cornelis, M.C., Kacprowski, T., Menni, C., Gustafsson, S., Pivin, E., Adamski, J., Artati, A., Eap, C.B.,  
9 Ehret, G., Friedrich, N., et al. (2016). Genome-wide association study of caffeine metabolites provides  
10 new insights to caffeine metabolism and dietary caffeine-consumption behavior. *Hum. Mol. Genet.* 25,  
11 5472–5482.
- 12 54. Feitosa, M.F., Kraja, A.T., Chasman, D.I., Sung, Y.J., Winkler, T.W., Ntalla, I., Guo, X., Franceschini, N.,  
13 Cheng, C.-Y., Sim, X., et al. (2018). Novel genetic associations for blood pressure identified via gene-  
14 alcohol interaction in up to 570K individuals across multiple ancestries. *PLoS One* 13, e0198166–  
15 e0198166.
- 16 55. Sulem, P., Gudbjartsson, D.F., Geller, F., Prokopenko, I., Feenstra, B., Aben, K.K.H., Franke, B., den  
17 Heijer, M., Kovacs, P., Stumvoll, M., et al. (2011). Sequence variants at CYP1A1-CYP1A2 and AHR  
18 associate with coffee consumption. *Hum. Mol. Genet.* 20, 2071–2077.
- 19 56. Coffee and Caffeine Genetics Consortium, Cornelis, M.C., Byrne, E.M., Esko, T., Nalls, M.A., Ganna,  
20 A., Paynter, N., Monda, K.L., Amin, N., Fischer, K., et al. (2015). Genome-wide meta-analysis identifies six  
21 novel loci associated with habitual coffee consumption. *Mol. Psychiatry* 20, 647–656.
- 22 57. Li, Y., Yao, J., Han, C., Yang, J., Chaudhry, M.T., Wang, S., Liu, H., and Yin, Y. (2016). Quercetin,  
23 Inflammation and Immunity. *Nutrients* 8, 167–167.
- 24 58. Simmons, D.L., Wagner, D., and Westover, K. (2000). Nonsteroidal Anti-Inflammatory Drugs,  
25 Acetaminophen, Cyclooxygenase 2, and Fever. *Clin. Infect. Dis.* 31, S211–S218.
- 26 59. Kraan, J., van den Broek, P., Verhoef, C., Grunhagen, D.J., Taal, W., Gratama, J.W., and Sleijfer, S.  
27 (2014). Endothelial CD276 (B7-H3) expression is increased in human malignancies and distinguishes  
28 between normal and tumour-derived circulating endothelial cells. *Br. J. Cancer* 111, 149.
- 29 60. Wood, J.J., Boyne, J.R., Paulus, C., Jackson, B.R., Nevels, M.M., Whitehouse, A., and Hughes, D.J.  
30 (2016). ARID3B: a Novel Regulator of the Kaposi's Sarcoma-Associated Herpesvirus Lytic Cycle. *J. Virol.*  
31 90, 9543.
- 32 61. Lin, C., Song, W., Bi, X., Zhao, J., Huang, Z., Li, Z., Zhou, J., Cai, J., and Zhao, H. (2014). Recent  
33 advances in the ARID family: focusing on roles in human cancer. *OncoTargets Ther.* 7, 315–324.
- 34 62. Jeong, Y.J., Park, S.H., Mun, S.H., Kwak, S.G., Lee, S.-J., and Oh, H.K. (2018). Association between lysyl  
35 oxidase and fibrotic focus in relation with inflammation in breast cancer. *Oncol. Lett.* 15, 2431–2440.
- 36 63. Burgoyne, R.D., and Morgan, A. (2003). Secretory Granule Exocytosis. *Physiol. Rev.* 83, 581–632.

- 1 64. Liu, L., Guo, Z., Tieu, Q., Castle, A., and Castle, D. (2002). Role of secretory carrier membrane protein  
2 SCAMP2 in granule exocytosis. *Mol. Biol. Cell* *13*, 4266–4278.
- 3 65. Blank, U., Madera-Salcedo, I.K., Danelli, L., Claver, J., Tiwari, N., Sánchez-Miranda, E., Vázquez-  
4 Victorio, G., Ramírez-Valadez, K.A., Macias-Silva, M., and González-Espinosa, C. (2014). Vesicular  
5 trafficking and signaling for cytokine and chemokine secretion in mast cells. *Front. Immunol.* *5*, 453–453.
- 6 66. Chen, X., Li, Y., Blankson, S., Liu, M., Huang, D., Redmond, H.P., Huang, J., Wang, J.H., and Wang, J.  
7 (2017). B7-H3 Augments Inflammatory Responses and Exacerbates Brain Damage via Amplifying NF- $\kappa$ B  
8 p65 and MAPK p38 Activation during Experimental Pneumococcal Meningitis. *PLOS ONE* *12*, e0171146.
- 9 67. Zhang, G., Wang, J., Kelly, J., Gu, G., Hou, J., Zhou, Y., Redmond, H.P., Wang, J.H., and Zhang, X.  
10 (2010). B7-H3 Augments the Inflammatory Response and Is Associated with Human Sepsis. *J. Immunol.*  
11 *185*, 3677.
- 12 68. Jeong, Y.J., Park, S.H., Mun, S.H., Kwak, S.G., Lee, S.-J., and Oh, H.K. (2018). Association between lysyl  
13 oxidase and fibrotic focus in relation with inflammation in breast cancer. *Oncol. Lett.* *15*, 2431–2440.
- 14 69. Zhao, W., Yang, A., Chen, W., Wang, P., Liu, T., Cong, M., Xu, A., Yan, X., Jia, J., and You, H. (2018).  
15 Inhibition of lysyl oxidase-like 1 (LOXL1) expression arrests liver fibrosis progression in cirrhosis by  
16 reducing elastin crosslinking. *Biochim. Biophys. Acta BBA - Mol. Basis Dis.* *1864*, 1129–1137.
- 17 70. Bellaye, P.-S., Shimbori, C., Upagupta, C., Sato, S., Shi, W., Gauldie, J., Ask, K., and Kolb, M. (2017).  
18 Lysyl Oxidase–Like 1 Protein Deficiency Protects Mice from Adenoviral Transforming Growth Factor- $\beta$ 1–  
19 induced Pulmonary Fibrosis. *Am. J. Respir. Cell Mol. Biol.* *58*, 461–470.
- 20 71. Kumar, P., Smith, T., Raeman, R., Chopyk, D.M., Brink, H., Liu, Y., Sulchek, T., and Anania, F.A. (2018).  
21 Periostin promotes liver fibrogenesis by activating lysyl oxidase in hepatic stellate cells. *J. Biol. Chem.*  
22 *293*, 12781–12792.
- 23 72. Hu, H., and Sun, S.-C. (2016). Ubiquitin signaling in immune responses. *Cell Res.* *26*, 457.
- 24 73. Wu, Y., Kang, J., Zhang, L., Liang, Z., Tang, X., Yan, Y., Qian, H., Zhang, X., Xu, W., and Mao, F. (2018).  
25 Ubiquitination regulation of inflammatory responses through NF- $\kappa$ B pathway. *Am. J. Transl. Res.* *10*,  
26 881–891.
- 27 74. Corn, J.E., and Vucic, D. (2014). Ubiquitin in inflammation: the right linkage makes all the difference.  
28 *Nat. Struct. Amp Mol. Biol.* *21*, 297.
- 29 75. Shetty, R., Ghosh, A., Lim, R.R., Subramani, M., Mihir, K., A. R, R., Ranganath, A., Nagaraj, S., Nuijts,  
30 R.M.M.A., Beuerman, R., et al. (2015). Elevated Expression of Matrix Metalloproteinase-9 and  
31 Inflammatory Cytokines in Keratoconus Patients Is Inhibited by Cyclosporine A. *Invest. Ophthalmol. Vis.*  
32 *Sci.* *56*, 738–750.
- 33 76. Demarquoy, J., and Borgne, F.L. (2014). Biosynthesis, metabolism and function of protectins and  
34 resolvins. *Clin. Lipidol.* *9*, 683–693.
- 35 77. Kohli, P., and Levy, B.D. (2009). Resolvins and protectins: mediating solutions to inflammation. *Br. J.*  
36 *Pharmacol.* *158*, 960–971.

- 1 78. Stark, D.T., and Bazan, N.G. (2011). Neuroprotectin D1 Induces Neuronal Survival and  
2 Downregulation of Amyloidogenic Processing in Alzheimer's Disease Cellular Models. *Mol. Neurobiol.*  
3 *43*, 131–138.
- 4 79. Downie, L.E., and Vingrys, A.J. (2018). Oral Omega-3 Supplementation Lowers Intraocular Pressure in  
5 Normotensive Adults. *Transl. Vis. Sci. Technol.* *7*, 1–1.
- 6 80. Huang, W.-B., Fan, Q., and Zhang, X.-L. (2011). Cod liver oil: a potential protective supplement for  
7 human glaucoma. *Int. J. Ophthalmol.* *4*, 648–651.
- 8 81. Nguyen, C.T.O., Bui, B.V., Sinclair, A.J., and Vingrys, A.J. (2007). Dietary Omega 3 Fatty Acids  
9 Decrease Intraocular Pressure with Age by Increasing Aqueous Outflow. *Invest. Ophthalmol. Vis. Sci.* *48*,  
10 756–762.
- 11 82. Mildenerger, J., Johansson, I., Sergin, I., Kjøbli, E., Damås, J.K., Razani, B., Flo, T.H., and Bjørkøy, G.  
12 (2017). N-3 PUFAs induce inflammatory tolerance by formation of KEAP1-containing SQSTM1/p62-  
13 bodies and activation of NFE2L2. *Autophagy* *13*, 1664–1678.
- 14 83. Dewundara, S.S., Wiggs, J.L., Sullivan, D.A., and Pasquale, L.R. (2016). Is Estrogen a Therapeutic  
15 Target for Glaucoma? *Semin. Ophthalmol.* *31*, 140–146.
- 16 84. Kitaoka, Y., Munemasa, Y., Hayashi, Y., Kuribayashi, J., Koseki, N., Kojima, K., Kumai, T., and Ueno, S.  
17 (2011). Axonal Protection by 17 $\beta$ -Estradiol through Thioredoxin-1 in Tumor Necrosis Factor-Induced  
18 Optic Neuropathy. *Endocrinology* *152*, 2775–2785.
- 19 85. Caprioli, J., Munemasa, Y., Kwong, J.M.K., and Piri, N. (2009). Overexpression of thioredoxins 1 and 2  
20 increases retinal ganglion cell survival after pharmacologically induced oxidative stress, optic nerve  
21 transection, and in experimental glaucoma. *Trans. Am. Ophthalmol. Soc.* *107*, 161–165.
- 22 86. Yildirim, Z., Yildirim, F., Uçgun, N.I., and Sepici-Dinçel, A. (2013). The role of the cytokines in the  
23 pathogenesis of pseudoexfoliation syndrome. *Int. J. Ophthalmol.* *6*, 50–53.
- 24 87. Zenkel, M., Krysta, A., Pasutto, F., Juenemann, A., Kruse, F.E., and Schlötzer-Schrehardt, U. (2011).  
25 Regulation of Lysyl Oxidase-like 1 (LOXL1) and Elastin-Related Genes by Pathogenic Factors Associated  
26 with Pseudoexfoliation Syndrome. *Invest. Ophthalmol. Vis. Sci.* *52*, 8488–8495.
- 27 88. Türkylmaz, K., Öner, V., Kirbas, A., Sevim, M.S., Sekeryapan, B., Özgür, G., and Durmus, M. (2013).  
28 Serum YKL-40 levels as a novel marker of inflammation and endothelial dysfunction in patients with  
29 pseudoexfoliation syndrome. *Eye Lond. Engl.* *27*, 854–859.
- 30 89. Gonen, T., Guzel, S., and Keskinbora, K.H. (2019). YKL-40 is a local marker for inflammation in  
31 patients with pseudoexfoliation syndrome. *Eye* *33*, 772–776.
- 32 90. Sorkhabi, R., Ghorbanihaghjo, A., Ahoor, M., Nahaei, M., and Rashtchizadeh, N. (2013). High-  
33 sensitivity C-reactive Protein and Tumor Necrosis Factor Alpha in Pseudoexfoliation Syndrome. *Oman*  
34 *Med. J.* *28*, 16–19.
- 35 91. Yüksel, N., Pirhan, D., Altıntaş, Ö., and Çağlar, Y. (2010). Systemic High-sensitivity C-reactive Protein  
36 Level in Pseudoexfoliation Syndrome and Pseudoexfoliation Glaucoma. *J. Glaucoma* *19*,.



- 1 92. Pasquale, L.R., Wiggs, J.L., Willett, W.C., and Kang, J.H. (2012). The Relationship between caffeine  
2 and coffee consumption and exfoliation glaucoma or glaucoma suspect: a prospective study in two  
3 cohorts. *Invest. Ophthalmol. Vis. Sci.* *53*, 6427–6433.
- 4 93. Grubben, M.J., Boers, G.H., Blom, H.J., Broekhuizen, R., de Jong, R., van Rijt, L., de Ruijter, E.,  
5 Swinkels, D.W., Nagengast, F.M., and Katan, M.B. (2000). Unfiltered coffee increases plasma  
6 homocysteine concentrations in healthy volunteers: a randomized trial. *Am. J. Clin. Nutr.* *71*, 480–484.
- 7 94. Urgert, R., van Vliet, T., Zock, P.L., and Katan, M.B. (2000). Heavy coffee consumption and plasma  
8 homocysteine: a randomized controlled trial in healthy volunteers. *Am. J. Clin. Nutr.* *72*, 1107–1110.
- 9 95. Bleich, S., Roedl, J., Von Ahsen, N., Schlötzer-Schrehardt, U., Reulbach, U., Beck, G., Kruse, F.E.,  
10 Naumann, G.O.H., Kornhuber, J., and Jünemann, A.G.M. (2004). Elevated homocysteine levels in  
11 aqueous humor of patients with pseudoexfoliation glaucoma. *Am. J. Ophthalmol.* *138*, 162–164.
- 12 96. Muqaku, B., Tahir, A., Klepeisz, P., Bileck, A., Kreutz, D., Mayer, R.L., Meier, S.M., Gerner, M.,  
13 Schmetterer, K., and Gerner, C. (2016). Coffee consumption modulates inflammatory processes in an  
14 individual fashion. *Mol. Nutr. Food Res.* *60*, 2529–2541.
- 15 97. Paiva, C., Beserra, B., Reis, C., Dorea, J., Da Costa, T., and Amato, A. (2019). Consumption of coffee or  
16 caffeine and serum concentration of inflammatory markers: A systematic review. *Crit. Rev. Food Sci.*  
17 *Nutr.* *59*, 652–663.
- 18 98. Furman, D., Chang, J., Lartigue, L., Bolen, C.R., Haddad, F., Gaudilliere, B., Ganio, E.A., Fragiadakis,  
19 G.K., Spitzer, M.H., Douchet, I., et al. (2017). Expression of specific inflammasome gene modules  
20 stratifies older individuals into two extreme clinical and immunological states. *Nat. Med.* *23*, 174.
- 21 99. Rivera-Oliver, M., and Díaz-Ríos, M. (2014). Using caffeine and other adenosine receptor antagonists  
22 and agonists as therapeutic tools against neurodegenerative diseases: a review. *Life Sci.* *101*, 1–9.
- 23 100. Berner, D., Zenkel, M., Pasutto, F., Hoja, U., Liravi, P., Gusek-Schneider, G.C., Kruse, F.E., Schödel, J.,  
24 Reis, A., and Schlötzer-Schrehardt, U. (2017). Posttranscriptional Regulation of LOXL1 Expression Via  
25 Alternative Splicing and Nonsense-Mediated mRNA Decay as an Adaptive Stress Response. *Invest.*  
26 *Ophthalmol. Vis. Sci.* *58*, 5930–5940.
- 27 101. Bobbs, A., Gellerman, K., Hallas, W.M., Joseph, S., Yang, C., Kurkewich, J., and Cowden Dahl, K.D.  
28 (2015). ARID3B Directly Regulates Ovarian Cancer Promoting Genes. *PloS One* *10*, e0131961–e0131961.
- 29 102. Ovodenko, B., Rostagno, A., Neubert, T.A., Shetty, V., Thomas, S., Yang, A., Liebmann, J., Ghiso, J.,  
30 and Ritch, R. (2007). Proteomic Analysis of Exfoliation Deposits. *Invest. Ophthalmol. Vis. Sci.* *48*, 1447–  
31 1457.
- 32 103. Srinivasan, K., Strickland, P., Valdes, A., Shin, G.C., and Hinck, L. (2003). Netrin-1/Neogenin  
33 Interaction Stabilizes Multipotent Progenitor Cap Cells during Mammary Gland Morphogenesis. *Dev. Cell*  
34 *4*, 371–382.
- 35 104. Tsai, C.-H., Chang, T.-Y., and Chang, Y.-C. (2009). Upregulation of lysyl oxidase expression in  
36 cyclosporin A-induced gingival overgrowth. *J. Dent. Sci.* *4*, 13–17.

- 1 105. Vahabi Surena, Salman Bahareh Nazemi, Rezazadeh Fahimeh, and Namdari Mahshid (2013). Effects  
2 of cyclosporine and phenytoin on biomarker expressions in gingival fibroblasts of children and adults: an  
3 in vitro study. *J. Basic Clin. Physiol. Pharmacol.* 25, 167.
- 4 106. Takahashi, N., Hayano, T., and Suzuki, M. (1989). Peptidyl-prolyl cis-trans isomerase is the  
5 cyclosporin A-binding protein cyclophilin. *Nature* 337, 473–475.
- 6 107. Seet, L.-F., Toh, L.Z., Finger, S.N., Chu, S.W.L., Stefanovic, B., and Wong, T.T. (2016). Valproic acid  
7 suppresses collagen by selective regulation of Smads in conjunctival fibrosis. *J. Mol. Med. Berl. Ger.* 94,  
8 321–334.
- 9 108. Chu, C., Deng, J., Xiang, L., Wu, Y., Wei, X., Qu, Y., and Man, Y. (2016). Evaluation of  
10 epigallocatechin-3-gallate (EGCG) cross-linked collagen membranes and concerns on osteoblasts. *Mater.*  
11 *Sci. Eng. C* 67, 386–394.
- 12 109. Carroll, C.C., Martineau, K., Arthur, K.A., Huynh, R.T., Volper, B.D., and Broderick, T.L. (2014). The  
13 effect of chronic treadmill exercise and acetaminophen on collagen and cross-linking in rat skeletal  
14 muscle and heart. *Am. J. Physiol.-Regul. Integr. Comp. Physiol.* 308, R294–R299.
- 15 110. Yoon, J.S., Chae, M.K., Jang, S.Y., Lee, S.Y., and Lee, E.J. (2012). Antifibrotic Effects of Quercetin in  
16 Primary Orbital Fibroblasts and Orbital Fat Tissue Cultures of Graves' Orbitopathy. *Invest. Ophthalmol.*  
17 *Vis. Sci.* 53, 5921–5929.
- 18 111. Ganbold, M., Shimamoto, Y., Ferdousi, F., Tominaga, K., and Isoda, H. (2019). Antifibrotic effect of  
19 methylated quercetin derivatives on TGF $\beta$ -induced hepatic stellate cells. *Biochem. Biophys. Rep.* 20,  
20 100678–100678.
- 21 112. Donejko, M., Przyłipiak, A., Rysiak, E., Głuszuk, K., and Surażyński, A. (2014). Influence of caffeine  
22 and hyaluronic acid on collagen biosynthesis in human skin fibroblasts. *Drug Des. Devel. Ther.* 8, 1923–  
23 1928.
- 24 113. Gressner, O.A. (2009). About coffee, cappuccino and connective tissue growth factor—Or how to  
25 protect your liver!? *Environ. Toxicol. Pharmacol.* 28, 1–10.
- 26 114. Fehrholz, M., Glaser, K., Speer, C.P., Seidenspinner, S., Ottensmeier, B., and Kunzmann, S. (2017).  
27 Caffeine modulates glucocorticoid-induced expression of CTGF in lung epithelial cells and fibroblasts.  
28 *Respir. Res.* 18, 51.
- 29 115. Tatler, A.L., Barnes, J., Habgood, A., Goodwin, A., McAnulty, R.J., and Jenkins, G. (2016). Caffeine  
30 inhibits TGF $\beta$  activation in epithelial cells, interrupts fibroblast responses to TGF $\beta$ , and reduces  
31 established fibrosis in *ex vivo* precision-cut lung slices. *Thorax* 71, 565.
- 32 116. Cataldo, A., Hamilton, D., Barnett, J., Paskevich, P., and Nixon, R. (1996). Properties of the  
33 endosomal-lysosomal system in the human central nervous system: disturbances mark most neurons in  
34 populations at risk to degenerate in Alzheimer's disease. *J. Neurosci.* 16, 186.
- 35 117. Taraboulos, A., Raeber, A.J., Borchelt, D.R., Serban, D., and Prusiner, S.B. (1992). Synthesis and  
36 trafficking of prion proteins in cultured cells. *Mol. Biol. Cell* 3, 851–863.

- 1 118. Kegel, K.B., Kim, M., Sapp, E., McIntyre, C., Castaño, J.G., Aronin, N., and DiFiglia, M. (2000).  
2 Huntingtin Expression Stimulates Endosomal–Lysosomal Activity, Endosome Tubulation, and Autophagy.  
3 *J. Neurosci.* *20*, 7268.
- 4 119. Kumar, P., Smith, T., Raeman, R., Chopyk, D.M., Brink, H., Liu, Y., Sulchek, T., and Anania, F.A.  
5 (2018). Periostin promotes liver fibrogenesis by activating lysyl oxidase in hepatic stellate cells. *J. Biol.*  
6 *Chem.* *293*, 12781–12792.
- 7 120. Laczko, R., Szauter, K.M., and Csiszar, K. (2014). LOXL1-associated candidate epithelial  
8 pathomechanisms in exfoliation glaucoma. *J. Glaucoma* *23*, S43–S47.
- 9 121. Zenkel, M., Lewczuk, P., Jünemann, A., Kruse, F.E., Naumann, G.O.H., and Schlötzer-Schrehardt, U.  
10 (2010). Proinflammatory cytokines are involved in the initiation of the abnormal matrix process in  
11 pseudoexfoliation syndrome/glaucoma. *Am. J. Pathol.* *176*, 2868–2879.
- 12 122. Wu, B., Li, Y., An, C., Jiang, D., Gong, L., Liu, Y., Liu, Y., Li, J., Ouyang, H., and Zou, X. (2018). High  
13 resolution profile of body wide pathological changes induced by abnormal elastin metabolism in Loxl1  
14 knockout mice. *BioRxiv* 353169.
- 15 123. Donley, D., Nelson, R., Gigley, J., and Fox, J. (2019). Mutant huntingtin protein alters the response  
16 of microglial cells to inflammatory stimuli. *BioRxiv* 550913.
- 17 124. Currais, A., Quehenberger, O., M Armando, A., Daugherty, D., Maher, P., and Schubert, D. (2016).  
18 Amyloid proteotoxicity initiates an inflammatory response blocked by cannabinoids. *Npj Aging Mech.*  
19 *Dis.* *2*, 16012.
- 20 125. Nagaoka, H., Mochida, Y., Atsawasuwan, P., Kaku, M., Kondoh, T., and Yamauchi, M. (2008).  
21 1,25(OH)2D3 regulates collagen quality in an osteoblastic cell culture system. *Biochem. Biophys. Res.*  
22 *Commun.* *377*, 674–678.
- 23 126. Ongen, H., Brown, A.A., Delaneau, O., Panousis, N.I., Nica, A.C., GTEx Consortium, and Dermitzakis,  
24 E.T. (2017). Estimating the causal tissues for complex traits and diseases. *Nat. Genet.*
- 25 127. Erkelens, M.N., and Mebius, R.E. (2017). Retinoic Acid and Immune Homeostasis: A Balancing Act.  
26 *Trends Immunol.* *38*, 168–180.
- 27 128. Kim, C.H. (2011). Chapter four - Retinoic Acid, Immunity, and Inflammation. In *Vitamins &*  
28 *Hormones*, G. Litwack, ed. (Academic Press), pp. 83–101.
- 29 129. Pino-Lagos, K., Guo, Y., and Noelle, R.J. (2010). Retinoic acid: a key player in immunity. *BioFactors*  
30 *Oxf. Engl.* *36*, 430–436.

31

32

33

34
